# Supplementary material for: Systematic review of ecological momentary assessment (EMA) studies of five public health-related behaviours: review protocol
Source: PubMed Central journal article supplement (PMC8287614; doi:10.1136/bmjopen-2020-046435), 2021-07-16
Supplement: bmjopen-2020-046435.draft_revisions.pdf [file bmjopen-2020-046435.draft_revisions.pdf]

# BMJ Open

BMJ Open is committed to open peer review. As part of this commitment we make the peer review history of every article we publish publicly available.

When an article is published we post the peer reviewers' comments and the authors' responses online. We also post the versions of the paper that were used during peer review. These are the versions that the peer review comments apply to.

The versions of the paper that follow are the versions that were submitted during the peer review process. They are not the versions of record or the final published versions. They should not be cited or distributed as the published version of this manuscript.

BMJ Open is an open access journal and the full, final, typeset and author-corrected version of record of the manuscript is available on our site with no access controls, subscription charges or pay-per-view fees (<http://bmjopen.bmj.com>).

If you have any questions on BMJ Open's open peer review process please email [info.bmjopen@bmj.com](mailto:info.bmjopen@bmj.com)

# BMJ Open

## Systematic review of Ecological Momentary Assessment (EMA) studies of five public health-related behaviours: Review Protocol.

|                               |                                                                                                                                                                                                                                                                                                                                                                                                                                                                                                                                                                                                                                                                                                                                                                     |
|-------------------------------|---------------------------------------------------------------------------------------------------------------------------------------------------------------------------------------------------------------------------------------------------------------------------------------------------------------------------------------------------------------------------------------------------------------------------------------------------------------------------------------------------------------------------------------------------------------------------------------------------------------------------------------------------------------------------------------------------------------------------------------------------------------------|
| Journal:                      | <i>BMJ Open</i>                                                                                                                                                                                                                                                                                                                                                                                                                                                                                                                                                                                                                                                                                                                                                     |
| Manuscript ID                 | bmjopen-2020-046435                                                                                                                                                                                                                                                                                                                                                                                                                                                                                                                                                                                                                                                                                                                                                 |
| Article Type:                 | Protocol                                                                                                                                                                                                                                                                                                                                                                                                                                                                                                                                                                                                                                                                                                                                                            |
| Date Submitted by the Author: | 02-Nov-2020                                                                                                                                                                                                                                                                                                                                                                                                                                                                                                                                                                                                                                                                                                                                                         |
| Complete List of Authors:     | Kwasnicka, Dominika; SWPS University of Social Sciences and Humanities Wroclaw Campus Library, Faculty of Psychology<br>Kale, Dimitra; University College London<br>Schneider, Verena; University College London<br>Keller, Jan; Freie Universität Berlin<br>Yeboah-Asiamah Asare, Bernard; Curtin University<br>Powell, Daniel; University of Aberdeen<br>Naughton, Felix; University of East Anglia Faculty of Medicine and Health Sciences, School of Health Sciences; University of East Anglia<br>ten Hoor, Gill A. ; Department of Work & Social Psychology, Maastricht University,<br>Verboon, Peter; Open Universiteit Nederland Faculteit Managementwetenschappen<br>Perski, Olga; University College London, Department of Behavioural Science and Health |
| Keywords:                     | PUBLIC HEALTH, STATISTICS & RESEARCH METHODS, SOCIAL MEDICINE, SPORTS MEDICINE, NUTRITION & DIETETICS                                                                                                                                                                                                                                                                                                                                                                                                                                                                                                                                                                                                                                                               |
|                               |                                                                                                                                                                                                                                                                                                                                                                                                                                                                                                                                                                                                                                                                                                                                                                     |

SCHOLARONE™  
Manuscripts

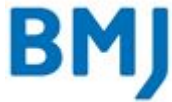

I, the Submitting Author has the right to grant and does grant on behalf of all authors of the Work (as defined in the below author licence), an exclusive licence and/or a non-exclusive licence for contributions from authors who are: i) UK Crown employees; ii) where BMJ has agreed a CC-BY licence shall apply, and/or iii) in accordance with the terms applicable for US Federal Government officers or employees acting as part of their official duties; on a worldwide, perpetual, irrevocable, royalty-free basis to BMJ Publishing Group Ltd ("BMJ") its licensees and where the relevant Journal is co-owned by BMJ to the co-owners of the Journal, to publish the Work in this journal and any other BMJ products and to exploit all rights, as set out in our [licence](#).

The Submitting Author accepts and understands that any supply made under these terms is made by BMJ to the Submitting Author unless you are acting as an employee on behalf of your employer or a postgraduate student of an affiliated institution which is paying any applicable article publishing charge ("APC") for Open Access articles. Where the Submitting Author wishes to make the Work available on an Open Access basis (and intends to pay the relevant APC), the terms of reuse of such Open Access shall be governed by a Creative Commons licence – details of these licences and which [Creative Commons](#) licence will apply to this Work are set out in our licence referred to above.

Other than as permitted in any relevant BMJ Author's Self Archiving Policies, I confirm this Work has not been accepted for publication elsewhere, is not being considered for publication elsewhere and does not duplicate material already published. I confirm all authors consent to publication of this Work and authorise the granting of this licence.

## SYSTEMATIC REVIEW PROTOCOL OF EMA STUDIES

**Title:** Systematic review of Ecological Momentary Assessment (EMA) studies of five public health-related behaviours: Review Protocol.

**Authors:** Dominika Kwasnicka<sup>1,2</sup>, Dimitra Kale<sup>3</sup>, Verena Schneider<sup>3</sup>, Jan Keller<sup>4</sup>, Bernard Yeboah-Asiamah Asare<sup>5,6</sup>, Daniel Powell<sup>6,7</sup>, Felix Naughton<sup>8</sup>, Gill ten Hoor<sup>9</sup>, Peter Verboon<sup>10</sup>, Olga Perski<sup>3</sup>

1. Faculty of Psychology, SWPS University of Social Sciences and Humanities, Aleksandra Ostrowskiego 30b, 53-238, Wrocław, Poland
2. NHMRC CRE in Digital Technology to Transform Chronic Disease Outcomes, Melbourne School of Population and Global Health, University of Melbourne, 333 Exhibition Street, 3000, Melbourne, Australia
3. Department of Behavioural Science and Health, Institute of Epidemiology and Health, Faculty of Population Health Sciences, University College London, United Kingdom
4. Department of Education and Psychology, Freie Universität Berlin, Berlin, Germany
5. School of Public Health, Curtin University, Kent Street, 6102, Perth, Australia
6. Health Psychology, Institute of Applied Health Sciences, University of Aberdeen, Aberdeen, AB25 2ZD, United Kingdom
7. Rowett Institute, University of Aberdeen, Aberdeen, AB25 2ZD, United Kingdom
8. Behavioural and Implementation Science Research Group, School of Health Sciences, University of East Anglia, Norwich, NR4 7UL, United Kingdom
9. Department of Work and Social Psychology, Faculty of Psychology and Neurosciences, Maastricht University, Maastricht, The Netherlands

## SYSTEMATIC REVIEW PROTOCOL OF EMA STUDIES

1  
2  
3 10. Faculty of Psychology, Open University, Heerlen, The Netherlands  
4  
5

6 **Corresponding author:** Dominika Kwasnicka, Faculty of psychology SWPS University of  
7  
8 Social Sciences and Humanities, Aleksandra Ostrowskiego 30b, 53-238, Wrocław and  
9  
10 NHMRC CRE in Digital Technology to Transform Chronic Disease Outcomes, Melbourne  
11  
12 School of Population and Global Health, University of Melbourne, 333 Exhibition Street, 3000,  
13  
14 Melbourne, Australia. E-mail: [dkwasnicka@swps.edu.pl](mailto:dkwasnicka@swps.edu.pl)  
15  
16

17  
18  
19 **Word count:** 2,958  
20  
21

22 **Keywords:** ambulatory assessment, Ecological Momentary Assessment, EMA, experience  
23  
24 sampling, health, psychology, systematic review, within-person design  
25  
26  
27  
28  
29  
30  
31  
32  
33  
34  
35  
36  
37  
38  
39  
40  
41  
42  
43  
44  
45  
46  
47  
48  
49  
50  
51  
52  
53  
54  
55  
56  
57  
58  
59  
60

## SYSTEMATIC REVIEW PROTOCOL OF EMA STUDIES

**ABSTRACT**

**Introduction:** Ecological Momentary Assessment (EMA) involves repeated, real-time assessments of phenomena (e.g., cognitions, emotions, behaviours) over a period of time in naturalistic settings. EMA is increasingly used to study both within- and between-person processes. We will review EMA studies investigating key health behaviours and synthesise: 1) study characteristics (e.g., frequency of assessments, adherence, incentives), 2) associations between psychological predictors and behaviours or behaviour-related outcomes, and 3) moderators of adherence to EMA protocols.

**Methods and analysis:** This review will focus on EMA studies conducted across five public health behaviours in adult, non-clinical populations: physical activity, dietary behaviour, alcohol consumption, tobacco smoking, and preventive sexual health behaviours. Studies need to have assessed at least one psychological or contextual predictor of these behaviours. Studies reporting exclusively on physiological outcomes (e.g., cortisol) or not conducted under free-living conditions will be excluded. We will search OVID Medline, Embase, PsycINFO and Web of Science using terms relevant to EMA and the selected health behaviours. Reference lists of existing systematic reviews of EMA studies will be hand searched. Identified articles will be screened by two reviewers. This review is expected to provide a comprehensive summary of EMA studies assessing psychological predictors of five public health behaviours.

**Ethics and dissemination:** The results will be disseminated through peer-reviewed publications and presentations. Data from included studies will be made available to other researchers. No ethics are required.

**Review registration:** The review protocol has been registered with PROSPERO 2020 CRD42020168314. Available from:  
[www.crd.york.ac.uk/prospéro/display\\_record.php?ID=CRD42020168314](http://www.crd.york.ac.uk/prospéro/display_record.php?ID=CRD42020168314).

## SYSTEMATIC REVIEW PROTOCOL OF EMA STUDIES

**Strengths and limitations of this study:**

- This systematic review will identify and synthesise evidence from EMA studies across five key public health behaviours in adult, non-clinical populations, including physical activity, healthy eating, alcohol consumption, tobacco smoking, and preventive sexual health behaviours.
- We will review characteristics of EMA studies (e.g., length of follow-up, assessment type, intensity, adherence rates) and associations between psychological predictors and behaviours or behaviour-related outcomes, examining rates of adherence to EMA protocols across different health behaviours and moderators of adherence (e.g., study setting, type of behaviour).
- This review is expected to inform design decisions in future observational EMA studies and just-in-time adaptive interventions aimed at understanding and improving health behaviours.
- Our comprehensive search strategy is likely to result in a large number of included studies; extracted data will be made available to other researchers, thus allowing for the exploration of additional research questions and potential for setting up a 'living review'.
- As included studies are likely to be heterogeneous, this may limit the overarching conclusions that can be drawn, and will likely prevent meta-analysis combining effect sizes from multiple studies and across all behaviours.

## SYSTEMATIC REVIEW PROTOCOL OF EMA STUDIES

**INTRODUCTION**

Ecological Momentary Assessment (EMA), also known as ambulatory assessment or experience sampling methodology, involves repeated, real-time assessments of phenomena (e.g., cognitions, emotions and behaviours) over a period of time in naturalistic settings (1). EMA is increasingly used to study within- and between-person processes, including associations between psychological and health behaviour-related variables (e.g., positive affect and physical activity in general population or stress and lapse risk in smokers attempting to stop). For researchers and healthcare professionals to understand and change behaviour, it is important for theories and interventions to be applicable to both momentary states of individuals (within-person processes) and groups of individuals (between-person processes) (2). Despite the popularity and importance of EMA for studying health-related behaviours, there has been no comprehensive systematic investigation of characteristics of EMA studies (e.g., rates of adherence, length of follow-ups, incentive schedules) and potential moderators of adherence (e.g., study setting, type of health behaviour), with attempts to describe associations between psychological predictors and behaviours or behaviour-related outcomes across key public health behaviours.

Previous reviews of EMA studies have focused on clinical conditions such as borderline personality disorder (3), psychotic disorder (4), mood disorders (5), binge eating (6), bulimia nervosa (7), anxiety disorder (8), schizophrenia (9), alcohol use disorder (10), chronic pain (11), and specific populations such as children and adolescents (12), youth (13) and older adults (14). Health behaviour-specific reviews of EMA studies have focused on physical activity (15,16), sedentary behaviour (16), alcohol use (17), craving and substance use (18), dietary behaviours (19), and the relationship between alcohol use and sexual decision making (20). Previous EMA reviews have also focused on interrelations between specific psychological



## SYSTEMATIC REVIEW PROTOCOL OF EMA STUDIES

1  
2  
3 variables, such as the association of everyday social interactions with intra-individual  
4  
5 variability in affect (21).  
6

7  
8 While systematic reviews of EMA studies focusing on specific health behaviours have  
9  
10 been conducted (18,22,23), there are no overarching reviews that can help address broad  
11  
12 questions about study characteristics (e.g., length of follow-up, frequency of EMAs, adherence,  
13  
14 incentive schedules), rates and moderators of adherence (e.g., study setting, participant  
15  
16 characteristics) and predictor-behaviour and predictor-outcome associations across different  
17  
18 health behaviours and potential moderators (e.g., study setting, study quality). It is expected  
19  
20 that this review will help fill this gap. We also expect that this review will help inform the  
21  
22 design of future EMA studies by providing a summary of best practice across research contexts,  
23  
24 settings and health-related behaviours. For instance, results may be useful for informing  
25  
26 researchers' understanding of what frequency or intensity of change we would expect to see at  
27  
28 what temporal resolution [i.e., informed by a 'theory of change' (24)], which can then inform  
29  
30 assessment scheduling decisions. This review is likely to include a large number of studies,  
31  
32 thus providing a comprehensive overview of the EMA literature.  
33  
34  
35  
36

### 37 **The current study**

38  
39 We will synthesise evidence from EMA studies that report either within- or between-  
40  
41 person predictor-behaviour or predictor-outcome associations. The review will focus on five  
42  
43 key public health behaviours: (1) physical activity (including sedentary behaviour), (2) healthy  
44  
45 eating, (3) alcohol consumption, (4) tobacco smoking and (5) sexual health behaviours  
46  
47 (including contraceptive use).  
48  
49

50  
51 The review aims are:

- 52  
53 1. To summarise adherence to EMAs, total length of data collection of EMAs, prompting  
54  
55 frequency of EMAs, and incentives structures across studies.  
56  
57  
58  
59  
60

## SYSTEMATIC REVIEW PROTOCOL OF EMA STUDIES

2. To describe within- and between-person predictor-behaviour and predictor-outcome associations across EMA studies (e.g., associations between intention and behaviour).
3. To assess potential moderators of adherence to EMAs (e.g., study setting, participant characteristics).

**METHODS AND ANALYSIS****Study design**

This review will adhere to the Preferred Reporting Items for Systematic Reviews and Meta-Analyses (PRISMA) checklist (Supplementary Material 1).

**Inclusion criteria**

This review will focus on five key public health behaviours in healthy adults (i.e. non-clinical populations) aged 18+ years, namely:

1. physical activity, including studies addressing sedentary behaviour;
2. dietary behaviour, including snacking or fruit and vegetable consumption
3. alcohol consumption;
4. tobacco smoking, including cigarettes, cigars or pipe;
5. sexual health behaviours, including contraceptive/condom use.

No restrictions on geographical location or publication date will be set. To be included, studies need to incorporate multiple (i.e., two or more) within-day, daily or weekly assessments of predictors, behaviours or behavioural outcomes (e.g., weight loss) and to have reported either (or both) within- or between-person predictor-behaviour or predictor-outcome associations. To be included, studies needed to assess one of the aforementioned behaviours and at least one psychological or contextual variable via EMAs.

In addition to self-report measures, included studies can use objective or physiological measures for psychological predictors (e.g., cortisol or heart rate variability to measure stress) and behavioural outcomes (e.g., accelerometer data to measure physical activity). Studies

## SYSTEMATIC REVIEW PROTOCOL OF EMA STUDIES

1  
2  
3 reporting associations between behaviours and psychological consequences (e.g., whether  
4 physical activity predicts affect) will be included providing that they also report psychological  
5 or contextual predictor-behaviour associations (e.g., whether positive affect predicts physical  
6 activity). We will include individuals with overweight and obesity given that 39% of adults  
7 globally fall into this category, with most Western countries averaging above 50% (25). Studies  
8 including participants with a diagnosed mental or physical health condition who were not  
9 recruited into the study on the basis of their condition will be included (e.g., studies including  
10 participants with clinical levels of depression but where this was not an inclusion criterion).  
11 Studies in which a behavioural or pharmacological intervention was delivered will be included  
12 providing that participants were asked to complete free-living EMAs.  
13  
14  
15  
16  
17  
18  
19  
20  
21  
22  
23  
24  
25

**Exclusion criteria**

26  
27  
28 Studies only reporting physiological outcomes (e.g., cortisol or heart rate variability to  
29 measure stress) will not be included. Laboratory studies will not be included. Studies including  
30 clinical populations and recruiting participants on the basis of being diagnosed with a physical  
31 or mental health condition such as cancer, cardiovascular disease, depression, binge eating  
32 disorder or substance use disorder (also including case-control studies) will be excluded.  
33  
34  
35  
36  
37  
38  
39  
40  
41  
42  
43  
44  
45  
46  
47  
48  
49  
50  
51  
52  
53  
54  
55  
56  
57  
58  
59  
60

**Search methods for the identification of studies*****Electronic searches***

We will search Ovid MEDLINE, Embase, PsycINFO and Web of Science (see Supplementary  
Material 2 for the full search strategy). Terms will be searched in titles and abstracts as free

## SYSTEMATIC REVIEW PROTOCOL OF EMA STUDIES

text terms or as index terms (e.g., Medical Subject Headings), as appropriate. We will combine two groups of terms, the first with terms relevant to EMAs and within-person study designs; the second with terms relevant to the five health behaviours addressed in this review.

Example terms used:

1. (ecological adj1 momentary adj1 assessment\*) OR (intensive adj1 longitudinal) OR (ambulatory adj1 assessment\*) OR (experience adj1 sampl\*) OR (daily adj1 diar\*) OR (ecological adj1 momentary adj1 intervention) OR within-person OR within-subject\* OR (single adj1 case) OR idiographic
2. tobacco OR smok\* OR alcohol\* OR (healthy adj3 eat\*) OR diet OR weight OR overweight OR obes\* OR physical activity OR exercise OR (medication adj1 adherence) OR (treatment adj1 adherence) OR (sexual adj1 health) OR condom OR contraceptive
3. 1 AND 2

Electronic and hand searches were conducted in January 2020. We restricted the search to human studies available in English that are published in peer-reviewed journals (Online Attachment 2).

### ***Searching for other sources***

Reference lists of existing systematic reviews of EMA studies will be hand searched and expertise within the review team will be used to identify additional articles of interest.

### **Data collection and analysis**

#### ***Selection of studies***

Identified articles will be merged using Covidence (26) and duplicate records will be removed. The two lead authors (DK and OP) will independently screen titles and abstracts (yes, maybe, no) against the pre-specified inclusion criteria. Full texts will be screened by two reviewers independently (yes, no); discrepancies will be resolved by the lead authors and inclusion will

## SYSTEMATIC REVIEW PROTOCOL OF EMA STUDIES

1  
2  
3 be further discussed with other team members if needed. In line with the PRISMA checklist,  
4  
5 key reasons for exclusion will be recorded at the full text stage. These will include: lack of  
6  
7 psychological predictors or outcomes; study not being relevant to the five key public health  
8  
9 behaviours of interest; wrong study design (not an EMA study); participants being recruited  
10  
11 based on a health condition (i.e., clinical population); participants younger than 18 years old;  
12  
13 studies of purchasing behaviours; conference abstracts; protocols; duplicates; studies not  
14  
15 published in English or no full text could be obtained. We will follow the hierarchy of the  
16  
17 exclusion criteria, listing the first reason from the aforementioned list as the key reason for  
18  
19 exclusion.  
20  
21  
22

**Data extraction and management**

23  
24  
25 A data extraction form will be developed in Microsoft Excel by the two lead authors in  
26  
27 collaboration with the study team to extract information and to import data into R for analysis.  
28  
29

30 Each study will be allocated a unique study identification number. Data will be extracted on:

- 31  
32  
33 - *Study description* (study author, year, country, study funder);
- 34  
35  
36 - *Participant characteristics* (sample size, mean or median age (SD); gender (% female);  
37  
38 educational attainment (% university education); population type (e.g., men who have  
39  
40 sex with men, older adults), ethnicity (% White ethnicity);
- 41  
42  
43 - *Health behaviour(s) assessed* (e.g., physical activity, dietary behaviour, tobacco  
44  
45 smoking); and how the health behaviour(s) were measured (e.g., daily/hourly step  
46  
47 count, number of cigarettes smoked);
- 48  
49  
50 - *Behavioural outcomes* (e.g., weight loss) and how they were measured (e.g., weekly  
51  
52 weigh-ins with Wi-Fi connected scales);
- 53  
54  
55 - *Psychological predictors* (e.g., intentions, self-efficacy) and how they were measured  
56  
57 (e.g., method, measurement frequency, whether the measure was developed for the  
58  
59 study, whether a single or multiple items were used);  
60

## SYSTEMATIC REVIEW PROTOCOL OF EMA STUDIES

- *EMA study type* (e.g., observational, interventional, both);
- *EMA delivery mode* (e.g., mobile phone, website/online, pen-and-paper);
- *EMA method* (e.g., signal contingent, event contingent);
- *EMA characteristics* (e.g., total study duration in days; prompting frequency (e.g., hourly, daily, weekly), incentive schedule (e.g., flat rate, payment per EMA);
- *Adherence to EMA* (e.g., % assessments completed out of available prompts);

For each study, one reviewer will extract the data. Twenty percent of studies will be double checked for accuracy and completeness by a second reviewer.

### Quality appraisal

Included studies may vary in quality, which will be considered through a quality appraisal. The appraisal tool was developed by the review team, based on an existing EMA reporting checklist (27), and includes the following five criteria: 1) rationale for EMA design, 2) prior power analysis to determine sample size, 3) percentage adherence to the EMA protocol, 4) treatment of missingness, and 5) level of data aggregation. Moreover, we will apply a standardized classification system based on the Effective Public Health Practice Project quality assessment tool (28,29) by rating the quality of each EMA study as strong ( $\geq 3$  strong ratings and no weak ratings), moderate, or weak ( $\geq 3$  weak ratings and no strong rating) (Table 1). The five quality indicators will be coded by one reviewer, with 20% double checked by a second reviewer. Discrepancies will be resolved through discussion among the lead authors. Where possible, study quality will be entered as a moderator of predictor-behaviour or predictor-outcome associations.

| <i>Topic: Factors</i>                                                                                           | <b>Strong</b>                                                                      | <b>Moderate</b>                                                         | <b>Weak</b>                                             |
|-----------------------------------------------------------------------------------------------------------------|------------------------------------------------------------------------------------|-------------------------------------------------------------------------|---------------------------------------------------------|
|                                                                                                                 | <b>Rationale</b>                                                                   |                                                                         |                                                         |
| <b><i>Rationale for EMA design provided:</i></b> Why was an EMA design chosen to examine the research question? | A strong rationale provided for the EMA design of predictor AND behaviour/ outcome | Rationale provided but not very strong for the EMA design of either the | No rationale for the EMA design regarding predictor and |

## SYSTEMATIC REVIEW PROTOCOL OF EMA STUDIES

|                                                                                                                                                                |                                                                                                                                                                                    | predictor OR<br>behaviour/<br>outcome                                                                     | behaviour/<br>outcome                                                           |
|----------------------------------------------------------------------------------------------------------------------------------------------------------------|------------------------------------------------------------------------------------------------------------------------------------------------------------------------------------|-----------------------------------------------------------------------------------------------------------|---------------------------------------------------------------------------------|
| <b>Power analysis, sample size and participant adherence</b>                                                                                                   |                                                                                                                                                                                    |                                                                                                           |                                                                                 |
| <b>Power analysis:</b> A priori power analysis to determine sample size                                                                                        | An a priori power analysis is reported and the enrolled sample size met power analysis indication / OR: sufficient explanation as to why an a priori power analysis was not needed | An a priori power analysis is reported but sufficient sample size/number of observations was not achieved | No information about power analysis / OR: a post-hoc power analysis is reported |
| <b>Adherence to EMA protocol:</b> Percentage of answered EMA prompts across all participants for the main EMA study period                                     | Percentage of answered EMA prompts >80%                                                                                                                                            | Percentage of answered EMA prompts 60-79.99%                                                              | Percentage of answered EMA prompts less than 60%                                |
| <b>Data analysis</b>                                                                                                                                           |                                                                                                                                                                                    |                                                                                                           |                                                                                 |
| <b>Treatment of missingness:</b> Report whether study dropout or non-adherence to EMAs (e.g., missed prompts) are related to specific variables                | Missing mechanisms/predictors are identified, reported and mitigated for if needed                                                                                                 | Missing mechanisms/predictors are identified and reported but not mitigated for                           | Missing mechanisms/predictors are not identified or reported                    |
| <b>Level of aggregation in data analysis:</b> Data underpinning the predictor and behaviour/outcome are aggregated (vs. maintained at the within-person level) | Both predictor and behaviour/outcome reported at the within-person level                                                                                                           | Either the predictor or the behaviour/outcome aggregated to the between-person level                      | Both predictor and behaviour/outcome aggregated to the between-person level     |

**Table 1.** Quality appraisal in included EMA studies.**Data synthesis**

A narrative (descriptive) synthesis will be conducted. We will summarise the number of EMA studies conducted for each of the five health behaviours, study setting (e.g., country, immediate study setting), and sample size (i.e. mean or median number of participants per study). We will then present results in relation to each research question. First, we will

## SYSTEMATIC REVIEW PROTOCOL OF EMA STUDIES

1  
2  
3 summarise study and EMA characteristics, e.g., study setting, population characteristics,  
4 percentage prompting frequency (e.g., % daily, % weekly), percentage type of EMA method  
5 (e.g., % event contingent, % random assessments, % continuous sensor based, % hybrid),  
6 percentage type of EMA delivery mode (e.g., % smartphone app delivery), percentage type of  
7 incentive structure (e.g., % flat payment, % payment per EMA, % no incentive), rates of EMA  
8 adherence (mean or median), and study duration (mean or median). Second, we will summarise  
9 within- and between-person predictor-behaviour and predictor-outcome associations across  
10 EMA studies (e.g., the type of psychological predictor/outcome assessed, measurement type,  
11 frequency of measurement). We will then assess, with regression analyses, whether EMA  
12 adherence varies depending on study setting, study characteristics, participant characteristics,  
13 or type of incentive schedule used. We do not have any pre-specified hypotheses. Exploratory  
14 analyses will be conducted in R v.3.5.1. If there is sufficient homogeneity between studies  
15 (e.g., similar predictors/outcomes assessed with similar measurement type and frequency),  
16 within- or between-person predictor-behaviour or predictor-outcome associations (e.g., odds  
17 ratios, relative risks, correlation coefficients, regression coefficients) will be synthesised with  
18 random effects meta-analyses, grouped by behaviour. Analyses will be conducted with the  
19 'metafor' or 'CTmeta' packages (30–32), as appropriate, also utilising 'jamovi' (33). Where  
20 means, standard deviations, etc., are not reported in the publications, we may contact study  
21 authors to request access to additional information.

**Patient and public involvement**

22  
23  
24  
25  
26  
27  
28  
29  
30  
31  
32  
33  
34  
35  
36  
37  
38  
39  
40  
41  
42  
43  
44  
45  
46  
47  
48  
49 A patient and public involvement representative reviewed a lay summary of the  
50 protocol for our systematic review. Positive feedback was received on the review's aims, the  
51 importance of the current research and choice of key behaviours relevant to public health. Once  
52 the review is completed, feedback will be sought from the additional patient and public  
53 involvement representatives about the interpretation of findings and plans for dissemination.  
54  
55  
56  
57  
58  
59  
60



## SYSTEMATIC REVIEW PROTOCOL OF EMA STUDIES

We will seek advice on how to best present the study outcomes and use them in order to design studies and interventions that are useful and relevant for the public.

**ETHICS AND DISSEMINATION**

This study does not require ethics approval as it will summarise data from previously published studies. A protocol was pre-registered on the international Prospective Register of Systematic Reviews (PROSPERO) and on the Open Science Framework; it will also be offered for peer-review and publication in an open access journal. The findings of the review will be disseminated through peer-reviewed publications and presentations at relevant conferences. The dataset will be made available to other researchers online via the creation of a digital object identifier, thus enabling further research questions to be addressed. We expect this review to be useful for researchers and healthcare practitioners who regularly design and interpret results from EMA studies. In the event that the number of studies identified is deemed too large to comprehensively describe all studies in one review article, additional topic- or behaviour-specific articles may be written.

**Summary**

EMA is a frequently used research method; however, an overview of studies using this method across key public health behaviours in healthy adults is lacking. This review will provide a comprehensive overview of associations between a psychological/contextual predictor and a health behaviour/behavioural outcome in EMA studies focusing on physical activity and sedentary behaviour, dietary behaviours, alcohol consumption, tobacco smoking and sexual health behaviours. This review will inform the future design of EMA studies and it will influence practice of assessing individuals in real life settings and providing interventions that are delivered at the time and place when and where required. This review will set a blueprint for how to conduct EMA studies to improve participants' adherence, participant burden and conduct meaningful studies in real life settings.

## SYSTEMATIC REVIEW PROTOCOL OF EMA STUDIES

## REFERENCES

1. Stone AA, Shiffman S. Ecological momentary assessment (EMA) in behavioral medicine. *Ann Behav Med.* 1994;
2. Johnston DW, Johnston M. Useful theories should apply to individuals. *Br J Health Psychol.* 2013;18(3):469–73.
3. Santangelo P, Bohus M, Ebner-Priemer UW. Ecological momentary assessment in borderline personality disorder: a review of recent findings and methodological challenges. *J Personal Disord.* 2014;28(4):555–76.
4. Bell IH, Lim MH, Rossell SL, Thomas N. Ecological momentary assessment and intervention in the treatment of psychotic disorders: a systematic review. *Psychiatr Serv.* 2017;68(11):1172–81.
5. aan het Rot M, Hogenelst K, Schoevers RA. Mood disorders in everyday life: A systematic review of experience sampling and ecological momentary assessment studies. *Clin Psychol Rev.* 2012;32(6):510–23.
6. Haedt-Matt AA, Keel PK. Revisiting the affect regulation model of binge eating: a meta-analysis of studies using ecological momentary assessment. *Psychol Bull.* 2011;137(4):660.
7. Goldschmidt AB, Wonderlich SA, Crosby RD, Engel SG, Lavender JM, Peterson CB, et al. Ecological momentary assessment of stressful events and negative affect in bulimia nervosa. *J Consult Clin Psychol.* 2014;82(1):30.
8. Walz LC, Nauta MH, aan het Rot M. Experience sampling and ecological momentary assessment for studying the daily lives of patients with anxiety disorders: A systematic review. *J Anxiety Disord.* 2014;28(8):925–37.
9. Mote J, Fulford D. Ecological momentary assessment of everyday social experiences of people with schizophrenia: A systematic review. *Schizophr Res.* 2020;216:56–68.
10. Morgenstern J, Kuerbis A, Muench F. Ecological momentary assessment and alcohol use disorder treatment. *Alcohol Res Curr Rev.* 2014;36(1):101.
11. May M, Junghaenel DU, Ono M, Stone AA, Schneider S. Ecological momentary assessment methodology in chronic pain research: a systematic review. *J Pain.* 2018;19(7):699–716.
12. Wen CKF, Schneider S, Stone AA, Spruijt-Metz D. Compliance with mobile ecological momentary assessment protocols in children and adolescents: a systematic review and meta-analysis. *J Med Internet Res.* 2017;19(4):e132.
13. Heron KE, Everhart RS, McHale SM, Smyth JM. Using mobile-technology-based ecological momentary assessment (EMA) methods with youth: A systematic review and recommendations. *J Pediatr Psychol.* 2017;42(10):1087–107.
14. Cain AE, Depp CA, Jeste DV. Ecological momentary assessment in aging research: a critical review. *J Psychiatr Res.* 2009;43(11):987–96.

## SYSTEMATIC REVIEW PROTOCOL OF EMA STUDIES

15. Dunton GF. Ecological momentary assessment in physical activity research. *Exerc Sport Sci Rev.* 2017;45(1):48.
16. Degroote L, DeSmet A, De Bourdeaudhuij I, Van Dyck D, Crombez G. Content validity and methodological considerations in ecological momentary assessment studies on physical activity and sedentary behaviour: a systematic review. *Int J Behav Nutr Phys Act.* 2020;17(1):1–13.
17. Wray TB, Merrill JE, Monti PM. Using ecological momentary assessment (EMA) to assess situation-level predictors of alcohol use and alcohol-related consequences. *Alcohol Res Curr Rev.* 2014;36(1):19.
18. Serre F, Fatseas M, Swendsen J, Auriacombe M. Ecological momentary assessment in the investigation of craving and substance use in daily life: a systematic review. *Drug Alcohol Depend.* 2015;148:1–20.
19. Maugeri A, Barchitta M. A systematic review of ecological momentary assessment of diet: implications and perspectives for nutritional epidemiology. *Nutrients.* 2019;11(11):2696.
20. Scott-Sheldon LA, Carey KB, Cunningham K, Johnson BT, Carey MP, MASH Research Team. Alcohol use predicts sexual decision-making: a systematic review and meta-analysis of the experimental literature. *AIDS Behav.* 2016;20(1):19–39.
21. Liu H, Xie QW, Lou VW. Everyday social interactions and intra-individual variability in affect: A systematic review and meta-analysis of ecological momentary assessment studies. *Motiv Emot.* 2019;43(2):339–53.
22. Schembre SM, Liao Y, O’connor SG, Hingle MD, Shen S-E, Hamoy KG, et al. Mobile ecological momentary diet assessment methods for behavioral research: Systematic review. *JMIR MHealth UHealth.* 2018;6(11):e11170.
23. Jones A, Remmerswaal D, Verveer I, Robinson E, Franken IHA, Wen CKF, et al. Compliance with ecological momentary assessment protocols in substance users: a meta-analysis. *Addiction.* 2019 Apr;114(4):609–19.
24. Collins LM. Analysis of longitudinal data: The integration of theoretical model, temporal design, and statistical model. *Annu Rev Psychol.* 2006;57:505–28.
25. WHO. Obesity and overweight [Internet]. 2018 [cited 2020 Jan 11]. Available from: <https://www.who.int/news-room/fact-sheets/detail/obesity-and-overweight>
26. Veritas Health Innovation. Covidence systematic review software. 2016;
27. Liao Y, Skelton K, Dunton G, Bruening M. A Systematic Review of Methods and Procedures Used in Ecological Momentary Assessments of Diet and Physical Activity Research in Youth: An Adapted STROBE Checklist for Reporting EMA Studies (CREMAS). *J Med Internet Res.* 2016 Jun 21;18(6):e151.
28. Taylor PJ, Kolt GS, Vandelanotte C, Caperchione CM, Mummery WK, George ES, et al. A review of the nature and effectiveness of nutrition interventions in adult males – a guide for intervention strategies. *Int J Behav Nutr Phys Act.* 2013;10(1):13.

## SYSTEMATIC REVIEW PROTOCOL OF EMA STUDIES

- 1
  - 2
  - 3
  - 4
  - 5
  - 6
  - 7
  - 8
  - 9
  - 10
  - 11
  - 12
  - 13
  - 14
  - 15
  - 16
  - 17
  - 18
  - 19
  - 20
  - 21
  - 22
  - 23
  - 24
  - 25
  - 26
  - 27
  - 28
  - 29
  - 30
  - 31
  - 32
  - 33
  - 34
  - 35
  - 36
  - 37
  - 38
  - 39
  - 40
  - 41
  - 42
  - 43
  - 44
  - 45
  - 46
  - 47
  - 48
  - 49
  - 50
  - 51
  - 52
  - 53
  - 54
  - 55
  - 56
  - 57
  - 58
  - 59
  - 60
29. Thomas BH, Ciliska D, Dobbins M, Micucci S. A Process for Systematically Reviewing the Literature: Providing the Research Evidence for Public Health Nursing Interventions. *Worldviews Evid Based Nurs*. 2004 Sep;1(3):176–84.
30. Balaji Y, Sankaranarayanan S, Chellappa R. Metareg: Towards domain generalization using meta-regularization. In 2018. p. 998–1008.
31. Viechtbauer W. Metafor: meta-analysis package for R. R Package Version. 2010;2010:1–0.
32. Kuiper RM, Ryan O. Meta-analysis of Lagged Regression Models: A Continuous-time Approach. *Struct Equ Model Multidiscip J*. 2020 May 3;27(3):396–413.
33. Sahin MD, Aybek EC. Jamovi: An Easy to Use Statistical Software for the Social Scientists. *Int J Assess Tools Educ*. 2019;6(4):670–92.

## SYSTEMATIC REVIEW PROTOCOL OF EMA STUDIES

**Authors' contributions**

DK, OP, DP and FN conceived the project. DK and OP are the project leads and coordinators, they jointly drafted the manuscript. All authors have made conceptual contributions to project design and procedures. All authors read, edited and approved the final version.

**Funding**

Dominika Kwasnicka's work is carried out within the HOMING program of the Foundation for Polish Science co-financed by the European Union under the European Regional Development Fund; grant number POIR.04.04.00-00-5CF3/18-00; HOMING 5/2018. Dimitra Kale and Olga Perski receive salary support from Cancer Research UK (C1417/A22962). Daniel Powell is funded by the Scottish Government's Rural and Environment Science and Analytical Services (RESAS) and by the School of Medicine, Medical Sciences, and Nutrition (SMMSN) at the University of Aberdeen. Felix Naughton's salary is covered by the Faculty of Medicine and Health Sciences at the University of East Anglia.

**Acknowledgments**

The review team would like to thank Dr Marta Marques for comments and suggestions on the initial version of the review protocol. The authors would like to thank the patient and public involvement representative who commented on the lay summary of our proposed plan, for their contribution to this research.

**Competing interests**

The authors have no competing interests to declare.

**Data statement**

Data associated with this manuscript will be available on OSF.

## SYSTEMATIC REVIEW PROTOCOL OF EMA STUDIES

## Supplementary Material 1

PRISMA-P (Preferred Reporting Items for Systematic review and Meta-Analysis Protocols)

2015 checklist: recommended items to address in a systematic review protocol\*

| Section and topic                 | Item No       | Checklist item                                                                                                                                                                                                                | Page number |
|-----------------------------------|---------------|-------------------------------------------------------------------------------------------------------------------------------------------------------------------------------------------------------------------------------|-------------|
| <b>ADMINISTRATIVE INFORMATION</b> |               |                                                                                                                                                                                                                               |             |
| Title:                            |               |                                                                                                                                                                                                                               |             |
| Identification                    | 1a            | Identify the report as a protocol of a systematic review                                                                                                                                                                      | 1           |
|                                   | Update        | 1b If the protocol is for an update of a previous systematic review, identify as such                                                                                                                                         | NA          |
| Registration                      | 2             | If registered, provide the name of the registry (such as PROSPERO) and registration number                                                                                                                                    | 3           |
| Authors:                          |               |                                                                                                                                                                                                                               |             |
| Contact                           | 3a            | Provide name, institutional affiliation, e-mail address of all protocol authors; provide physical mailing address of corresponding author                                                                                     | 1-2         |
|                                   | Contributions | 3b Describe contributions of protocol authors and identify the guarantor of the review                                                                                                                                        | 18          |
| Amendments                        | 4             | If the protocol represents an amendment of a previously completed or published protocol, identify as such and list changes; otherwise, state plan for documenting important protocol amendments                               | NA          |
| Support:                          |               |                                                                                                                                                                                                                               |             |
| Sources                           | 5a            | Indicate sources of financial or other support for the review                                                                                                                                                                 | 18          |
| Sponsor                           | 5b            | Provide name for the review funder and/or sponsor                                                                                                                                                                             | 18          |
| Role of sponsor or funder         | 5c            | Describe roles of funder(s), sponsor(s), and/or institution(s), if any, in developing the protocol                                                                                                                            | 18          |
| <b>INTRODUCTION</b>               |               |                                                                                                                                                                                                                               |             |
| Rationale                         | 6             | Describe the rationale for the review in the context of what is already known                                                                                                                                                 | 6           |
| Objectives                        | 7             | Provide an explicit statement of the question(s) the review will address with reference to participants, interventions, comparators, and outcomes (PICO)                                                                      | 6-7         |
| <b>METHODS</b>                    |               |                                                                                                                                                                                                                               |             |
| Eligibility criteria              | 8             | Specify the study characteristics (such as PICO, study design, setting, time frame) and report characteristics (such as years considered, language, publication status) to be used as criteria for eligibility for the review | 7-8         |

## SYSTEMATIC REVIEW PROTOCOL OF EMA STUDIES

|                                    |     |                                                                                                                                                                                                                                                  |               |
|------------------------------------|-----|--------------------------------------------------------------------------------------------------------------------------------------------------------------------------------------------------------------------------------------------------|---------------|
| Information sources                | 9   | Describe all intended information sources (such as electronic databases, contact with study authors, trial registers or other grey literature sources) with planned dates of coverage                                                            | 8-9           |
| Search strategy                    | 10  | Present draft of search strategy to be used for at least one electronic database, including planned limits, such that it could be repeated                                                                                                       | 9; Appendix 2 |
| Study records:                     |     |                                                                                                                                                                                                                                                  |               |
| Data management                    | 11a | Describe the mechanism(s) that will be used to manage records and data throughout the review                                                                                                                                                     | 9-11          |
| Selection process                  | 11b | State the process that will be used for selecting studies (such as two independent reviewers) through each phase of the review (that is, screening, eligibility and inclusion in meta-analysis)                                                  | 9-11          |
| Data collection process            | 11c | Describe planned method of extracting data from reports (such as piloting forms, done independently, in duplicate), any processes for obtaining and confirming data from investigators                                                           | 10-11         |
| Data items                         | 12  | List and define all variables for which data will be sought (such as PICO items, funding sources), any pre-planned data assumptions and simplifications                                                                                          | 10-11         |
| Outcomes and prioritization        | 13  | List and define all outcomes for which data will be sought, including prioritization of main and additional outcomes, with rationale                                                                                                             | 10-11         |
| Risk of bias in individual studies | 14  | Describe anticipated methods for assessing risk of bias of individual studies, including whether this will be done at the outcome or study level, or both; state how this information will be used in data synthesis                             | 11-12         |
| Data synthesis                     | 15a | Describe criteria under which study data will be quantitatively synthesised                                                                                                                                                                      | 12-13         |
|                                    | 15b | If data are appropriate for quantitative synthesis, describe planned summary measures, methods of handling data and methods of combining data from studies, including any planned exploration of consistency (such as $I^2$ , Kendall's $\tau$ ) | 13            |
|                                    | 15c | Describe any proposed additional analyses (such as sensitivity or subgroup analyses, meta-regression)                                                                                                                                            | 13            |
|                                    | 15d | If quantitative synthesis is not appropriate, describe the type of summary planned                                                                                                                                                               | 13            |
| Meta-bias(es)                      | 16  | Specify any planned assessment of meta-bias(es) (such as publication bias across studies, selective reporting within studies)                                                                                                                    | 11-12         |
| Confidence in cumulative evidence  | 17  | Describe how the strength of the body of evidence will be assessed (such as GRADE)                                                                                                                                                               | 11-12         |

\* It is strongly recommended that this checklist be read in conjunction with the PRISMA-P Explanation and Elaboration (cite when available) for important clarification on the items. Amendments to a review protocol should be tracked and dated. The copyright for PRISMA-P



## SYSTEMATIC REVIEW PROTOCOL OF EMA STUDIES

(including checklist) is held by the PRISMA-P Group and is distributed under a Creative Commons Attribution Licence 4.0. *From: Shamseer L, Moher D, Clarke M, Ghersi D, Liberati A, Petticrew M, Shekelle P, Stewart L, PRISMA-P Group. Preferred reporting items for systematic review and meta-analysis protocols (PRISMA-P) 2015: elaboration and explanation. BMJ. 2015 Jan 2;349(jan02 1):g7647.*

For peer review only



SYSTEMATIC REVIEW PROTOCOL OF EMA STUDIES

1  
2  
3  
4  
5  
6  
7  
8  
9  
10  
11  
12  
13  
14  
15  
16  
17  
18  
19  
20  
21  
22  
23  
24  
25  
26  
27  
28  
29  
30  
31  
32  
33  
34  
35  
36  
37  
38  
39  
40  
41  
42  
43  
44  
45  
46  
47  
48  
49  
50  
51  
52  
53  
54  
55  
56  
57  
58  
59  
60

For peer review only

## SYSTEMATIC REVIEW PROTOCOL OF EMA STUDIES

**Supplementary Material 2****Full search strategy: Ovid MEDLINE, Embase, PsycINFO**

1. (ecological adj1 momentary adj1 assessment\*).ti,ab.
2. (intensive adj1 longitudinal).ti,ab.
3. (ambulatory adj1 assessment\*).ti,ab.
4. (experience adj1 sampl\*).ti,ab.
5. (daily adj1 diar\*).ti,ab.
6. (ecological adj1 momentary adj1 intervention).ti,ab.
7. within-person.ti,ab.
8. within-subject\*.ti,ab.
9. (single adj1 case).ti,ab.
10. idiographic.ti,ab.
11. 1 OR 2 OR 3 OR 4 OR 5 OR 6 OR 7 OR 8 OR 9 OR 10
12. tobacco.ti,ab.
13. smok\*.ti,ab.
14. alcohol\*.ti,ab.
15. diet.ti,ab.
16. weight.ti,ab.
17. overweight.ti,ab.
18. obes\*.ti,ab.
19. (healthy adj3 eat\*).ti,ab.
20. physical activity.ti,ab.
21. exercise.ti,ab.
22. (sexual adj1 health).ti,ab.
23. condom.ti,ab.

## SYSTEMATIC REVIEW PROTOCOL OF EMA STUDIES

1  
2  
3 24. contraceptive.ti,ab.  
4

5 25. 12 OR 13 OR 14 OR 15 OR 16 OR 17 OR 18 OR 19 OR 20 OR 21 OR 22 OR 23 OR 24  
6

7  
8 26. 11 AND 25  
9

10 Results: **12,677**  
11  
12  
13

### 14 **Web of Science**

15  
16  
17 1. TS=(ecological NEAR/1 momentary NEAR/1 assessment\*)  
18

19 2. TS=(ecological NEAR/1 momentary NEAR/1 intervention)  
20

21 3. TS=(intensive NEAR/1 longitudinal)  
22

23 4. TS=(ambulatory NEAR/1 assessment\*)  
24

25 5. TS=(experience NEAR/1 sampl\*)  
26

27 6. TS=(daily NEAR/1 diar\*)  
28

29 7. TS=(within-person or within-subject\* or idiographic)  
30

31 8. TS=(single NEAR/1 case)  
32

33 9. 1 OR 2 OR 3 OR 4 OR 5 OR 6 OR 7 OR 8  
34

35 10. TS=(healthy NEAR/1 eat\*)  
36

37 11. TS=(sexual NEAR/1 health)  
38

39 12. TS=(smok\* or tobacco\* or alcohol\* or diet or weight or overweight or obes\* or physical  
40 activity or exercise or condom or contraceptive)  
41

42 13. 10 OR 11 OR 12  
43

44 14. 9 AND 13  
45

46  
47  
48  
49  
50 Results: **8,141**  
51  
52  
53  
54  
55  
56  
57  
58  
59  
60

# BMJ Open

## Systematic review of Ecological Momentary Assessment (EMA) studies of five public health-related behaviours: Review Protocol.

|                                 |                                                                                                                                                                                                                                                                                                                                                                                                                                                                                                                                                                                                                                                                                                                                                                     |
|---------------------------------|---------------------------------------------------------------------------------------------------------------------------------------------------------------------------------------------------------------------------------------------------------------------------------------------------------------------------------------------------------------------------------------------------------------------------------------------------------------------------------------------------------------------------------------------------------------------------------------------------------------------------------------------------------------------------------------------------------------------------------------------------------------------|
| Journal:                        | <i>BMJ Open</i>                                                                                                                                                                                                                                                                                                                                                                                                                                                                                                                                                                                                                                                                                                                                                     |
| Manuscript ID                   | bmjopen-2020-046435.R1                                                                                                                                                                                                                                                                                                                                                                                                                                                                                                                                                                                                                                                                                                                                              |
| Article Type:                   | Protocol                                                                                                                                                                                                                                                                                                                                                                                                                                                                                                                                                                                                                                                                                                                                                            |
| Date Submitted by the Author:   | 31-Mar-2021                                                                                                                                                                                                                                                                                                                                                                                                                                                                                                                                                                                                                                                                                                                                                         |
| Complete List of Authors:       | Kwasnicka, Dominika; SWPS University of Social Sciences and Humanities Wroclaw Campus Library, Faculty of Psychology<br>Kale, Dimitra; University College London<br>Schneider, Verena; University College London<br>Keller, Jan; Freie Universität Berlin<br>Yeboah-Asiamah Asare, Bernard; Curtin University<br>Powell, Daniel; University of Aberdeen<br>Naughton, Felix; University of East Anglia Faculty of Medicine and Health Sciences, School of Health Sciences; University of East Anglia<br>ten Hoor, Gill A. ; Department of Work & Social Psychology, Maastricht University,<br>Verboon, Peter; Open Universiteit Nederland Faculteit Managementwetenschappen<br>Perski, Olga; University College London, Department of Behavioural Science and Health |
| <b>Primary Subject Heading</b>: | Public health                                                                                                                                                                                                                                                                                                                                                                                                                                                                                                                                                                                                                                                                                                                                                       |
| Secondary Subject Heading:      | Public health                                                                                                                                                                                                                                                                                                                                                                                                                                                                                                                                                                                                                                                                                                                                                       |
| Keywords:                       | PUBLIC HEALTH, STATISTICS & RESEARCH METHODS, SOCIAL MEDICINE, SPORTS MEDICINE, NUTRITION & DIETETICS                                                                                                                                                                                                                                                                                                                                                                                                                                                                                                                                                                                                                                                               |
|                                 |                                                                                                                                                                                                                                                                                                                                                                                                                                                                                                                                                                                                                                                                                                                                                                     |

SCHOLARONE™  
Manuscripts



I, the Submitting Author has the right to grant and does grant on behalf of all authors of the Work (as defined in the below author licence), an exclusive licence and/or a non-exclusive licence for contributions from authors who are: i) UK Crown employees; ii) where BMJ has agreed a CC-BY licence shall apply, and/or iii) in accordance with the terms applicable for US Federal Government officers or employees acting as part of their official duties; on a worldwide, perpetual, irrevocable, royalty-free basis to BMJ Publishing Group Ltd ("BMJ") its licensees and where the relevant Journal is co-owned by BMJ to the co-owners of the Journal, to publish the Work in this journal and any other BMJ products and to exploit all rights, as set out in our [licence](#).

The Submitting Author accepts and understands that any supply made under these terms is made by BMJ to the Submitting Author unless you are acting as an employee on behalf of your employer or a postgraduate student of an affiliated institution which is paying any applicable article publishing charge ("APC") for Open Access articles. Where the Submitting Author wishes to make the Work available on an Open Access basis (and intends to pay the relevant APC), the terms of reuse of such Open Access shall be governed by a Creative Commons licence – details of these licences and which [Creative Commons](#) licence will apply to this Work are set out in our licence referred to above.

Other than as permitted in any relevant BMJ Author's Self Archiving Policies, I confirm this Work has not been accepted for publication elsewhere, is not being considered for publication elsewhere and does not duplicate material already published. I confirm all authors consent to publication of this Work and authorise the granting of this licence.

## SYSTEMATIC REVIEW PROTOCOL OF EMA STUDIES

**Title:** Systematic review of Ecological Momentary Assessment (EMA) studies of five public health-related behaviours: Review Protocol.

**Authors:** Dominika Kwasnicka<sup>1,2</sup>, Dimitra Kale<sup>3</sup>, Verena Schneider<sup>3</sup>, Jan Keller<sup>4</sup>, Bernard Yeboah-Asiamah Asare<sup>5,6</sup>, Daniel Powell<sup>6,7</sup>, Felix Naughton<sup>8</sup>, Gill ten Hoor<sup>9</sup>, Peter Verboon<sup>10</sup>, Olga Perski<sup>3</sup>

1. Faculty of Psychology, SWPS University of Social Sciences and Humanities, Aleksandra Ostrowskiego 30b, 53-238, Wrocław, Poland
2. NHMRC CRE in Digital Technology to Transform Chronic Disease Outcomes, Melbourne School of Population and Global Health, University of Melbourne, 333 Exhibition Street, 3000, Melbourne, Australia
3. Department of Behavioural Science and Health, Institute of Epidemiology and Health, Faculty of Population Health Sciences, University College London, United Kingdom
4. Department of Education and Psychology, Freie Universität Berlin, Berlin, Germany
5. School of Public Health, Curtin University, Kent Street, 6102, Perth, Australia
6. Health Psychology, Institute of Applied Health Sciences, University of Aberdeen, Aberdeen, AB25 2ZD, United Kingdom
7. Rowett Institute, University of Aberdeen, Aberdeen, AB25 2ZD, United Kingdom
8. Behavioural and Implementation Science Research Group, School of Health Sciences, University of East Anglia, Norwich, NR4 7UL, United Kingdom
9. Department of Work and Social Psychology, Faculty of Psychology and Neurosciences, Maastricht University, Maastricht, The Netherlands

## SYSTEMATIC REVIEW PROTOCOL OF EMA STUDIES

1  
2  
3 10. Faculty of Psychology, Open University, Heerlen, The Netherlands  
4  
5

6 **Corresponding author:** Dominika Kwasnicka, Faculty of psychology SWPS University of  
7  
8 Social Sciences and Humanities, Aleksandra Ostrowskiego 30b, 53-238, Wrocław and  
9  
10 NHMRC CRE in Digital Technology to Transform Chronic Disease Outcomes, Melbourne  
11  
12 School of Population and Global Health, University of Melbourne, 333 Exhibition Street, 3000,  
13  
14 Melbourne, Australia. E-mail: [dkwasnicka@swps.edu.pl](mailto:dkwasnicka@swps.edu.pl)  
15  
16  
17

18  
19 **Word count:** 3,446  
20  
21

22 **Keywords:** ambulatory assessment, Ecological Momentary Assessment, EMA, experience  
23  
24 sampling, health, psychology, systematic review, within-person design  
25  
26  
27  
28  
29  
30  
31  
32  
33  
34  
35  
36  
37  
38  
39  
40  
41  
42  
43  
44  
45  
46  
47  
48  
49  
50  
51  
52  
53  
54  
55  
56  
57  
58  
59  
60

## SYSTEMATIC REVIEW PROTOCOL OF EMA STUDIES

**ABSTRACT**

**Introduction:** Ecological Momentary Assessment (EMA) involves repeated, real-time assessments of phenomena (e.g., cognitions, emotions, behaviours) over a period of time in naturalistic settings. EMA is increasingly used to study both within- and between-person processes. We will review EMA studies investigating key health behaviours and synthesise: 1) study characteristics (e.g., frequency of assessments, adherence, incentives), 2) associations between psychological predictors and behaviours, and 3) moderators of adherence to EMA protocols.

**Methods and analysis:** This review will focus on EMA studies conducted across five public health behaviours in adult, non-clinical populations: movement behaviour (including physical activity and sedentary behaviour), dietary behaviour, alcohol consumption, tobacco smoking, and preventive sexual health behaviours. Studies need to have assessed at least one psychological or contextual predictor of these behaviours. Studies reporting exclusively on physiological outcomes (e.g., cortisol) or those not conducted under free-living conditions will be excluded. We will search OVID Medline, Embase, PsycINFO and Web of Science using terms relevant to EMA and the selected health behaviours. Reference lists of existing systematic reviews of EMA studies will be hand searched. Identified articles will be screened by two reviewers. This review is expected to provide a comprehensive summary of EMA studies assessing psychological or contextual predictors of five public health behaviours.

**Ethics and dissemination:** The results will be disseminated through peer-reviewed publications and presentations. Data from included studies will be made available to other researchers. No ethics are required.

**Review registration:** The review protocol has been registered with PROSPERO 2020 CRD42020168314. Available from:  
[www.crd.york.ac.uk/prospero/display\\_record.php?ID=CRD42020168314](http://www.crd.york.ac.uk/prospero/display_record.php?ID=CRD42020168314).



## SYSTEMATIC REVIEW PROTOCOL OF EMA STUDIES

**Strengths and limitations of this study:**

- A protocol for systematic review is provided for EMA studies in adult, non-clinical populations.
- We included EMA studies of five key public health behaviours including movement behaviours, dietary behaviours, alcohol consumption, tobacco smoking, and preventive sexual health behaviours.
- We will review characteristics of EMA studies (e.g., study duration in days, incentives, adherence rates) and associations between psychological predictors and behaviours, examining rates of adherence to EMA protocols across different health behaviours and moderators of adherence (e.g., study setting, type of behaviour).
- Extracted data will be made available to other researchers, thus allowing for the exploration of additional research questions and potential for setting up a 'living review'.
- As included studies are likely to be heterogeneous, this may limit the overarching conclusions that can be drawn, and will likely prevent meta-analysis combining effect sizes from multiple studies and across all behaviours.

## SYSTEMATIC REVIEW PROTOCOL OF EMA STUDIES

**INTRODUCTION**

Ecological Momentary Assessment (EMA), also known as ambulatory assessment or experience sampling methodology, involves repeated, real-time assessments of phenomena (e.g., cognitions, emotions and behaviours) over a period of time in naturalistic settings (1). EMA is increasingly used to study within- and between-person processes, including associations between psychological and health behaviour-related variables (e.g., positive affect and physical activity in general population or stress and lapse risk in smokers attempting to stop). For researchers and healthcare professionals to understand and change behaviour, it is important for theories and interventions to be applicable to both momentary states of individuals (within-person processes) and groups of individuals (between-person processes) (2). Despite the popularity and importance of EMA for studying health-related behaviours, there has been no comprehensive systematic investigation of characteristics of EMA studies (e.g., rates of adherence, study duration in days, incentive schedules) and potential moderators of adherence (e.g., study setting, type of health behaviour), with attempts to describe associations between psychological predictors (e.g., intentions, self-efficacy) and key public health behaviours.

Previous reviews of EMA studies have focused on clinical conditions such as borderline personality disorder (3), psychotic disorder (4), mood disorders (5), binge eating (6), bulimia nervosa (7), anxiety disorder (8), schizophrenia (9), alcohol use disorder (10), chronic pain (11), and specific populations such as children and adolescents (12), youth (13) and older adults (14). Health behaviour-specific reviews of EMA studies have focused on physical activity (15,16), sedentary behaviour (16), alcohol use (17), craving and substance use (18), dietary behaviours (19), and the relationship between alcohol use and sexual decision making (20). Previous EMA reviews have also focused on interrelations between specific psychological

## SYSTEMATIC REVIEW PROTOCOL OF EMA STUDIES

1  
2  
3 variables, such as the association of everyday social interactions with intra-individual  
4  
5 variability in affect (21).  
6

7  
8 While systematic reviews of EMA studies focusing on specific health behaviours have  
9  
10 been conducted (18,22,23), there are no overarching reviews that can help address broad  
11  
12 questions about study characteristics (e.g., study duration in days, adherence, incentive  
13  
14 schedules), rates and moderators of adherence (e.g., study setting, participant characteristics)  
15  
16 and predictor-behaviour associations across different health behaviours and potential  
17  
18 moderators (e.g., study setting, study quality). It is expected that this review will help fill this  
19  
20 gap. We also expect that this review will help inform the design of future EMA studies by  
21  
22 providing a summary of best practice across research contexts, settings and health-related  
23  
24 behaviours. For instance, results may be useful for informing researchers' understanding of  
25  
26 what frequency or intensity of change we would expect to see at what temporal resolution [i.e.,  
27  
28 informed by a 'theory of change' (24)], which can then inform assessment scheduling  
29  
30 decisions. This review is likely to include a large number of studies, thus providing a  
31  
32 comprehensive overview of the EMA literature.  
33  
34  
35  
36

### 37 **The current study**

38  
39 We will synthesise evidence from EMA studies that report either within- or between-  
40  
41 person predictor-behaviour associations. The review will focus on five key public health  
42  
43 behaviours: (1) movement behaviours (including physical activity and sedentary behaviour),  
44  
45 (2) dietary behaviours, (3) alcohol consumption, (4) tobacco smoking and (5) preventive sexual  
46  
47 health behaviours (including contraceptive use).  
48  
49

50  
51 The review aims are:

- 52  
53 1. To summarise adherence to EMAs, total length of data collection of EMAs, prompting  
54  
55 frequency of EMAs, and incentives structures across studies.  
56  
57  
58  
59  
60

## SYSTEMATIC REVIEW PROTOCOL OF EMA STUDIES

2. To describe within- and between-person predictor-behaviour associations across EMA studies (e.g., associations between intention and behaviour).
3. To assess potential moderators of adherence to EMAs (e.g., study setting, participant characteristics).

This review is intentionally broad in scope to provide an overview of the field for researchers interested in the application of EMAs to the study of health-related behaviours. We expect this overarching review to help identify patterns and key knowledge gaps.

## METHODS AND ANALYSIS

### Study design

This review will adhere to the Preferred Reporting Items for Systematic Reviews and Meta-Analyses (PRISMA) checklist (Supplementary Material 1). The review start date was 15<sup>th</sup> September 2019 and the planned end date is 30<sup>th</sup> December 2021.

### Inclusion criteria

This review will focus on five key public health behaviours in healthy adults (i.e. non-clinical populations) aged 18+ years, namely:

1. movement behaviours, including physical activity and sedentary behaviour;
2. dietary behaviours, including snacking or fruit and vegetable consumption;
3. alcohol consumption;
4. tobacco smoking, including cigarette, cigar or pipe smoking;
5. preventive sexual health behaviours, including contraceptive/condom use.

No restrictions on geographical location or publication date will be set. To be included, studies need to incorporate multiple (i.e., two or more) within-day, daily or weekly assessments of predictors and behaviours, and to have reported either (or both) within- or between-person predictor-behaviour (e.g., stress predicting unhealthy snack consumption) associations. The

## SYSTEMATIC REVIEW PROTOCOL OF EMA STUDIES

1  
2  
3 frequency of the EMAs should plausibly match how the target behaviour (and psychological  
4 and contextual predictors) theoretically or empirically unfolds over time, e.g., daily  
5 assessments of steps, weekly assessments of gym class attendance if the class is undertaken  
6 only once a week. To be included, studies need to assess one of the aforementioned behaviours  
7 and at least one psychological or contextual variable via EMAs.  
8  
9

10  
11 In this review, we defined psychological variables as emergent properties of a distributed  
12 network of neurons, including cognition (e.g., beliefs, attitudes, goals), emotion (e.g., negative  
13 affect, cravings) and processes operating on these (e.g., self-regulation, learning), which are  
14 linked to behaviour. We further define contextual variables as any potential environmental  
15 (e.g., social or physical) influences on behaviour, including the presence of other people,  
16 weather, or the availability of unhealthy foods/cigarettes/alcohol. The psychological and  
17 contextual variables will be closely assessed by the reviewers as to their suitability for  
18 inclusion/exclusion in the review.  
19  
20  
21  
22  
23  
24  
25  
26  
27  
28  
29  
30  
31  
32

33 In addition to self-report measures, included studies can use physiological measures of  
34 psychological predictors (e.g., cortisol or heart rate variability to measure stress) or behaviours  
35 (e.g., accelerometer data to measure physical activity or sedentary behaviour). Studies  
36 reporting associations between behaviours and psychological consequences (e.g., whether  
37 physical activity predicts affect) will be included providing that they also report psychological  
38 or contextual predictor-behaviour associations (e.g., whether positive affect predicts physical  
39 activity). We will include individuals with overweight and obesity given that 39% of adults  
40 globally fall into this category, with most Western countries averaging above 50% (25). Studies  
41 including participants with a diagnosed mental or physical health condition who were not  
42 recruited into the study on the basis of their condition will be included (e.g., studies including  
43 participants with clinical levels of depression but where this was not an inclusion criterion).  
44  
45  
46  
47  
48  
49  
50  
51  
52  
53  
54  
55  
56  
57  
58  
59  
60

## SYSTEMATIC REVIEW PROTOCOL OF EMA STUDIES

1  
2  
3 Studies in which a behavioural or pharmacological intervention was delivered will be included  
4  
5 providing that participants were asked to complete free-living EMAs.  
6

**Exclusion criteria**

7  
8  
9  
10 Laboratory studies will not be included. Studies examining clinical populations, that is,  
11 solely recruiting participants on the basis of being diagnosed with a physical or mental health  
12 condition such as cancer, cardiovascular disease, depression, binge eating disorder or substance  
13 use disorder (also including case-control studies) will be excluded. Studies focusing only on  
14 purchasing behaviours (e.g., tobacco purchasing, food purchasing) will not be included. Studies  
15 focusing on e-cigarettes will be also excluded. Studies not published in English or where no  
16 full text could be obtained will also not be included. Although behaviour-behaviour  
17 associations may also be considered relevant, our electronic search is not designed to capture  
18 such studies, and behaviour-behaviour associations will hence not be considered further in this  
19 review.  
20  
21  
22  
23  
24  
25  
26  
27  
28  
29  
30  
31  
32

**Search methods for the identification of studies***Electronic searches*

33  
34  
35 We will search Ovid MEDLINE, Embase, PsycINFO and Web of Science (see Supplementary  
36 Material 2 for the full search strategy). Terms will be searched in titles and abstracts as free  
37 text terms or as index terms (e.g., Medical Subject Headings), as appropriate. We will combine  
38 two groups of terms, the first with terms relevant to EMAs and within-person study designs;  
39 the second with terms relevant to the five health behaviours addressed in this review.  
40  
41  
42  
43  
44  
45  
46  
47  
48

49 Example terms used:

- 50  
51  
52 1. (ecological adj1 momentary adj1 assessment\*) OR (intensive adj1 longitudinal) OR  
53 (ambulatory adj1 assessment\*) OR (experience adj1 sampl\*) OR (daily adj1 diar\*) OR  
54 (ecological adj1 momentary adj1 intervention) OR within-person OR within-subject\*  
55  
56 OR (single adj1 case) OR idiographic OR intraindividual  
57  
58  
59  
60

## SYSTEMATIC REVIEW PROTOCOL OF EMA STUDIES

- 1
- 2
- 3 2. tobacco OR smok\* OR cigarette OR alcohol\* OR drinking OR addict\* OR (healthy
- 4 adj3 eat\*) OR diet OR weight OR overweight OR obes\* OR physical activity OR
- 5 exercise OR sedentary OR sitting OR leisure OR (sexual adj1 health) OR condom OR
- 6 contraceptive
- 7
- 8
- 9
- 10
- 11
- 12 3. 1 AND 2
- 13

14 Electronic and hand searches were conducted in January 2020 and updated in February 2021.

15 We restricted the search to human studies available in English that are published in peer-

16 reviewed journals (Online Attachment 2).

### 17 ***Searching for other sources***

18 Reference lists of existing systematic reviews of EMA studies will be hand searched and

19 expertise within the review team will be used to identify additional articles of interest.

### 20 **Data collection and analysis**

#### 21 ***Selection of studies***

22 Identified articles will be merged using Covidence (26) and duplicate records will be removed.

23 The three lead authors (DK, OP and JK) will independently screen titles and abstracts (yes,

24 maybe, no) against the pre-specified inclusion criteria. Full texts will be screened by two

25 reviewers independently (yes, no); discrepancies will be resolved by the lead authors and

26 inclusion will be further discussed with other team members if needed. In line with the

27 PRISMA checklist, key reasons for exclusion will be recorded at the full text stage. These will

28 include: lack of psychological predictors or outcomes; study not being relevant to the five key

29 public health behaviours of interest; wrong study design (not an EMA study); participants

30 being recruited based on a health condition (i.e., clinical population); participants younger than

31 18 years old; studies of purchasing behaviours; conference abstracts; protocols; duplicates;

32 studies not published in English or no full text could be obtained. We will follow the hierarchy

33

34

35

36

37

38

39

40

41

42

43

44

45

46

47

48

49

50

51

52

53

54

55

56

57

58

59

60

## SYSTEMATIC REVIEW PROTOCOL OF EMA STUDIES

of the exclusion criteria, listing the first reason from the aforementioned list as the key reason for exclusion.

**Data extraction and management**

A data extraction form will be developed in Microsoft Excel to extract information and to import data into R for analysis. Each study will be allocated a unique study identification number. Data will be extracted on:

- *Study description* (study author, year, country, study funder);
- *Participant characteristics* (sample size; mean or median age (SD); gender (% female); educational attainment (% university education); population type (e.g., men who have sex with men, older adults, general population), ethnicity (% White ethnicity);
- *EMA study type* (e.g., observational, interventional, both);
- *EMA delivery mode* (e.g., mobile phone, website/online, pen-and-paper);
- *EMA method* (e.g., signal contingent, event contingent, multiple);
- *EMA characteristics* (e.g., total study duration in days; prompting frequency (e.g., hourly, daily, weekly), incentive schedule (e.g., flat rate, payment per EMA);
- *Adherence to EMA* (e.g., average % EMAs completed out of available prompts);
- *Health behaviour(s) assessed* (e.g., physical activity, sedentary behaviour, dietary behaviour, tobacco smoking); and how the health behaviour(s) were measured (e.g., hourly step count, number of cigarettes smoked per day);
- *Psychological and contextual predictors* (e.g., intentions, self-efficacy, presence of other smokers) and how they were measured (e.g., EMA method, measurement frequency, whether the measure was developed for the study (versus precedent), whether a single item or multiple items were used);



## SYSTEMATIC REVIEW PROTOCOL OF EMA STUDIES

- *Statistical model used to examine predictor-behaviour association* (e.g. multilevel model, generalised estimating equation) and whether these associations were analysed on the within- and/or between-level;
- *Level of aggregation in data analysis* (i.e. whether data underpinning the predictor-behaviour association are aggregated vs. maintained at the within-person level);
- *Coefficients and effect sizes from statistical models* (e.g. odds ratios, relative risks, regression coefficients);
- *Control variables in multivariate models* (e.g. age, sex)

For each study, one reviewer will extract the data. At least 20% of studies stratified by behaviour (e.g., 20% of all alcohol consumption studies) will be double checked for accuracy and completeness by a second reviewer. In case there are any uncertainties related to data extraction (e.g., the primary data extractor is uncertain about a particular parameter or a large number of discrepancies are observed across the primary and secondary data extractor), we will double check additional studies until agreement is achieved. All review authors will be involved in data extraction and double checking.

### **Quality appraisal**

Included studies may vary in quality, which will be considered through a quality appraisal. The appraisal tool was developed by the review team, based on an existing EMA reporting checklist (27), and includes the following four criteria: 1) rationale for EMA design, 2) a priori power analysis to determine sample size, 3) percentage adherence to the EMA protocol, and 4) treatment of missingness (Table 1). The quality indicators will be coded by one reviewer, with 20% or more double checked by a second reviewer. Discrepancies will be resolved through discussion among the lead authors. Where possible, each study quality indicator will be entered as a moderator of predictor-behaviour associations. As each criterion

## SYSTEMATIC REVIEW PROTOCOL OF EMA STUDIES

refers to a different aspect of study quality, we will not summarise study quality, but will present how studies score on each selected dimension.

| <b>Topic: Factors</b>                                                                                                                              | <b>Strong</b>                                                                                                                                                                      | <b>Moderate</b>                                                                                           | <b>Weak</b>                                                                     |
|----------------------------------------------------------------------------------------------------------------------------------------------------|------------------------------------------------------------------------------------------------------------------------------------------------------------------------------------|-----------------------------------------------------------------------------------------------------------|---------------------------------------------------------------------------------|
| <b>Rationale</b>                                                                                                                                   |                                                                                                                                                                                    |                                                                                                           |                                                                                 |
| <b>1. Rationale for EMA design provided:</b> Why was an EMA design chosen to examine the research question?                                        | A strong rationale provided for the EMA design of predictor AND behaviour/ outcome                                                                                                 | Rationale provided but not very strong for the EMA design of either the predictor OR behaviour/ outcome   | No rationale for the EMA design regarding predictor and behaviour/ outcome      |
| <b>Power analysis, sample size and participant adherence</b>                                                                                       |                                                                                                                                                                                    |                                                                                                           |                                                                                 |
| <b>2. Power analysis:</b> A priori power analysis to determine sample size                                                                         | An a priori power analysis is reported and the enrolled sample size met power analysis indication / OR: sufficient explanation as to why an a priori power analysis was not needed | An a priori power analysis is reported but sufficient sample size/number of observations was not achieved | No information about power analysis / OR: a post-hoc power analysis is reported |
| <b>3. Adherence to EMA protocol:</b> Percentage of answered EMA prompts across all participants for the main EMA study period                      | Percentage of answered EMA prompts >80%                                                                                                                                            | Percentage of answered EMA prompts 60-79.99%                                                              | Percentage of answered EMA prompts less than 60%                                |
| <b>Data analysis</b>                                                                                                                               |                                                                                                                                                                                    |                                                                                                           |                                                                                 |
| <b>4. Treatment of missingness:</b> Report whether study dropout or non-adherence to EMAs (e.g., missed prompts) are related to specific variables | Missing mechanisms/predictors are identified, reported and mitigated for if needed                                                                                                 | Missing mechanisms/predictors are identified and reported but not mitigated for                           | Missing mechanisms/predictors are not identified or reported                    |

**Table 1.** Quality appraisal in included EMA studies.

### Data synthesis

All quantitative analyses will be conducted in R v.3.5.1. A narrative (descriptive) synthesis will be conducted. We will summarise the number of EMA studies conducted for

## SYSTEMATIC REVIEW PROTOCOL OF EMA STUDIES

1  
2  
3 each of the five health behaviours, study setting (e.g., country, immediate study setting), and  
4 sample size (i.e. mean or median number of participants per study). We will then present results  
5  
6 in relation to each research question.  
7  
8

9  
10 To address the first aim, we will summarise study and EMA characteristics, e.g., study  
11 setting, population characteristics, percentage prompting frequency (e.g., % daily, % weekly),  
12 percentage type of EMA method (e.g., % event contingent, % random assessments, %  
13 continuous sensor based, % hybrid), percentage type of EMA delivery mode (e.g., %  
14 smartphone app delivery), percentage type of incentive structure (e.g., % flat payment, %  
15 payment per EMA, % no incentive), rates of EMA adherence (mean or median), and study  
16 duration (mean or median).  
17  
18

19 To address the second aim, we will summarise within- and between-person predictor-  
20 behaviour associations across EMA studies (e.g., the type of psychological or contextual  
21 predictor assessed, measurement type, frequency of measurement). If there is sufficient  
22 homogeneity between studies (e.g., similar predictors assessed with similar measurement type  
23 and frequency across  $\geq 3$  studies), within- or between-person predictor-behaviour associations  
24 (e.g., odds ratios, relative risks, regression coefficients) will be synthesised with random effects  
25 meta-analyses, grouped by behaviour. Analyses will be conducted with the 'metafor' or  
26 'CTmeta' packages (30–32), as appropriate, also utilising 'jamovi' (33). Where sufficient detail  
27 on model parameter estimates is lacking in the publications, we may contact study authors to  
28 request access to additional information.  
29  
30

31 To address the third aim, we will assess, with regression analyses, whether EMA  
32 adherence varies depending on study setting, study characteristics, participant characteristics,  
33 or type of incentive schedule used. We do not have any pre-specified hypotheses. Where  
34 appropriate, moderator analyses will be conducted to examine whether predictor-behaviour  
35  
36  
37  
38  
39  
40  
41  
42  
43  
44  
45  
46  
47  
48  
49  
50  
51  
52  
53  
54  
55  
56  
57  
58  
59  
60

## SYSTEMATIC REVIEW PROTOCOL OF EMA STUDIES

1  
2  
3 associations vary depending on study setting, study characteristics, participant characteristics,  
4  
5 or type of incentive schedule used.  
6

**Patient and public involvement**

7  
8  
9  
10 A patient and public involvement representative reviewed a lay summary of the  
11  
12 protocol for our systematic review. Positive feedback was received on the review's aims, the  
13  
14 importance of the current research and choice of key behaviours relevant to public health. Once  
15  
16 the review is completed, feedback will be sought from the additional patient and public  
17  
18 involvement representatives about the interpretation of findings and plans for dissemination.  
19  
20 We will seek advice on how to best present the study outcomes and use them in order to design  
21  
22 studies and interventions that are useful and relevant for the public.  
23  
24

**ETHICS AND DISSEMINATION**

25  
26  
27  
28 This study does not require ethics approval as it will summarise data from previously published  
29  
30 studies. A protocol was pre-registered on the international Prospective Register of Systematic  
31  
32 Reviews (PROSPERO) and on the Open Science Framework; it will also be offered for peer-  
33  
34 review and publication in an open access journal. The findings of the review will be  
35  
36 disseminated through peer-reviewed publications and presentations at relevant conferences.  
37  
38 The dataset will be made available to other researchers online via the creation of a digital object  
39  
40 identifier, thus enabling further research questions to be addressed. We expect this review to  
41  
42 be useful for researchers and healthcare practitioners who regularly design and interpret results  
43  
44 from EMA studies. We plan to publish overarching review and subsequently five behaviour-  
45  
46 specific reviews that will provide a more in-depth synthesis of predictor-behaviour  
47  
48 associations.  
49  
50  
51  
52

**Summary**

53  
54  
55  
56 EMA is a frequently used research method; however, an overview of studies using this  
57  
58 method across key public health behaviours in healthy adults is lacking. This review will  
59  
60

## SYSTEMATIC REVIEW PROTOCOL OF EMA STUDIES

1  
2  
3 provide a comprehensive overview of associations between a psychological/contextual  
4 predictor and a health behaviour in EMA studies focusing on movement behaviours, dietary  
5 behaviours, alcohol consumption, tobacco smoking and sexual health behaviours. This review  
6 will inform the future design of EMA studies and it will influence practice of assessing  
7 individuals in real life settings and providing interventions that are delivered at the time and  
8 place when and where required. This review will set a blueprint for how to conduct EMA  
9 studies to improve participants' adherence and conduct meaningful studies in real life settings.  
10  
11  
12  
13  
14  
15  
16  
17  
18  
19  
20  
21  
22  
23  
24  
25  
26  
27  
28  
29  
30  
31  
32  
33  
34  
35  
36  
37  
38  
39  
40  
41  
42  
43  
44  
45  
46  
47  
48  
49  
50  
51  
52  
53  
54  
55  
56  
57  
58  
59  
60

## SYSTEMATIC REVIEW PROTOCOL OF EMA STUDIES

## REFERENCES

1. Stone AA, Shiffman S. Ecological momentary assessment (EMA) in behavioral medicine. *Ann Behav Med.* 1994;
2. Johnston DW, Johnston M. Useful theories should apply to individuals. *Br J Health Psychol.* 2013;18(3):469–73.
3. Santangelo P, Bohus M, Ebner-Priemer UW. Ecological momentary assessment in borderline personality disorder: a review of recent findings and methodological challenges. *J Personal Disord.* 2014;28(4):555–76.
4. Bell IH, Lim MH, Rossell SL, Thomas N. Ecological momentary assessment and intervention in the treatment of psychotic disorders: a systematic review. *Psychiatr Serv.* 2017;68(11):1172–81.
5. aan het Rot M, Hogenelst K, Schoevers RA. Mood disorders in everyday life: A systematic review of experience sampling and ecological momentary assessment studies. *Clin Psychol Rev.* 2012;32(6):510–23.
6. Haedt-Matt AA, Keel PK. Revisiting the affect regulation model of binge eating: a meta-analysis of studies using ecological momentary assessment. *Psychol Bull.* 2011;137(4):660.
7. Goldschmidt AB, Wonderlich SA, Crosby RD, Engel SG, Lavender JM, Peterson CB, et al. Ecological momentary assessment of stressful events and negative affect in bulimia nervosa. *J Consult Clin Psychol.* 2014;82(1):30.
8. Walz LC, Nauta MH, aan het Rot M. Experience sampling and ecological momentary assessment for studying the daily lives of patients with anxiety disorders: A systematic review. *J Anxiety Disord.* 2014;28(8):925–37.
9. Mote J, Fulford D. Ecological momentary assessment of everyday social experiences of people with schizophrenia: A systematic review. *Schizophr Res.* 2020;216:56–68.
10. Morgenstern J, Kuerbis A, Muench F. Ecological momentary assessment and alcohol use disorder treatment. *Alcohol Res Curr Rev.* 2014;36(1):101.
11. May M, Junghaenel DU, Ono M, Stone AA, Schneider S. Ecological momentary assessment methodology in chronic pain research: a systematic review. *J Pain.* 2018;19(7):699–716.
12. Wen CKF, Schneider S, Stone AA, Spruijt-Metz D. Compliance with mobile ecological momentary assessment protocols in children and adolescents: a systematic review and meta-analysis. *J Med Internet Res.* 2017;19(4):e132.
13. Heron KE, Everhart RS, McHale SM, Smyth JM. Using mobile-technology-based ecological momentary assessment (EMA) methods with youth: A systematic review and recommendations. *J Pediatr Psychol.* 2017;42(10):1087–107.
14. Cain AE, Depp CA, Jeste DV. Ecological momentary assessment in aging research: a critical review. *J Psychiatr Res.* 2009;43(11):987–96.

## SYSTEMATIC REVIEW PROTOCOL OF EMA STUDIES

15. Dunton GF. Ecological momentary assessment in physical activity research. *Exerc Sport Sci Rev.* 2017;45(1):48.
16. Degroote L, DeSmet A, De Bourdeaudhuij I, Van Dyck D, Crombez G. Content validity and methodological considerations in ecological momentary assessment studies on physical activity and sedentary behaviour: a systematic review. *Int J Behav Nutr Phys Act.* 2020;17(1):1–13.
17. Wray TB, Merrill JE, Monti PM. Using ecological momentary assessment (EMA) to assess situation-level predictors of alcohol use and alcohol-related consequences. *Alcohol Res Curr Rev.* 2014;36(1):19.
18. Serre F, Fatseas M, Swendsen J, Auriacombe M. Ecological momentary assessment in the investigation of craving and substance use in daily life: a systematic review. *Drug Alcohol Depend.* 2015;148:1–20.
19. Maugeri A, Barchitta M. A systematic review of ecological momentary assessment of diet: implications and perspectives for nutritional epidemiology. *Nutrients.* 2019;11(11):2696.
20. Scott-Sheldon LA, Carey KB, Cunningham K, Johnson BT, Carey MP, MASH Research Team. Alcohol use predicts sexual decision-making: a systematic review and meta-analysis of the experimental literature. *AIDS Behav.* 2016;20(1):19–39.
21. Liu H, Xie QW, Lou VW. Everyday social interactions and intra-individual variability in affect: A systematic review and meta-analysis of ecological momentary assessment studies. *Motiv Emot.* 2019;43(2):339–53.
22. Schembre SM, Liao Y, O’connor SG, Hingle MD, Shen S-E, Hamoy KG, et al. Mobile ecological momentary diet assessment methods for behavioral research: Systematic review. *JMIR MHealth UHealth.* 2018;6(11):e11170.
23. Jones A, Remmerswaal D, Verveer I, Robinson E, Franken IHA, Wen CKF, et al. Compliance with ecological momentary assessment protocols in substance users: a meta-analysis. *Addiction.* 2019 Apr;114(4):609–19.
24. Collins LM. Analysis of longitudinal data: The integration of theoretical model, temporal design, and statistical model. *Annu Rev Psychol.* 2006;57:505–28.
25. WHO. Obesity and overweight [Internet]. 2018 [cited 2020 Jan 11]. Available from: <https://www.who.int/news-room/fact-sheets/detail/obesity-and-overweight>
26. Veritas Health Innovation. Covidence systematic review software. 2016;
27. Liao Y, Skelton K, Dunton G, Bruening M. A Systematic Review of Methods and Procedures Used in Ecological Momentary Assessments of Diet and Physical Activity Research in Youth: An Adapted STROBE Checklist for Reporting EMA Studies (CREMAS). *J Med Internet Res.* 2016 Jun 21;18(6):e151.
28. Taylor PJ, Kolt GS, Vandelanotte C, Caperchione CM, Mummery WK, George ES, et al. A review of the nature and effectiveness of nutrition interventions in adult males – a guide for intervention strategies. *Int J Behav Nutr Phys Act.* 2013;10(1):13.

## SYSTEMATIC REVIEW PROTOCOL OF EMA STUDIES

- 1
  - 2
  - 3
  - 4
  - 5
  - 6
  - 7
  - 8
  - 9
  - 10
  - 11
  - 12
  - 13
  - 14
  - 15
  - 16
  - 17
  - 18
  - 19
  - 20
  - 21
  - 22
  - 23
  - 24
  - 25
  - 26
  - 27
  - 28
  - 29
  - 30
  - 31
  - 32
  - 33
  - 34
  - 35
  - 36
  - 37
  - 38
  - 39
  - 40
  - 41
  - 42
  - 43
  - 44
  - 45
  - 46
  - 47
  - 48
  - 49
  - 50
  - 51
  - 52
  - 53
  - 54
  - 55
  - 56
  - 57
  - 58
  - 59
  - 60
29. Thomas BH, Ciliska D, Dobbins M, Micucci S. A Process for Systematically Reviewing the Literature: Providing the Research Evidence for Public Health Nursing Interventions. *Worldviews Evid Based Nurs*. 2004 Sep;1(3):176–84.
30. Balaji Y, Sankaranarayanan S, Chellappa R. Metareg: Towards domain generalization using meta-regularization. In 2018. p. 998–1008.
31. Viechtbauer W. Metafor: meta-analysis package for R. R Package Version. 2010;2010:1–0.
32. Kuiper RM, Ryan O. Meta-analysis of Lagged Regression Models: A Continuous-time Approach. *Struct Equ Model Multidiscip J*. 2020 May 3;27(3):396–413.
33. Sahin MD, Aybek EC. Jamovi: An Easy to Use Statistical Software for the Social Scientists. *Int J Assess Tools Educ*. 2019;6(4):670–92.



## SYSTEMATIC REVIEW PROTOCOL OF EMA STUDIES

**Authors' contributions**

DK, OP, DP and FN conceived the project. DK and OP are the project leads and coordinators, they jointly drafted the manuscript. All authors (DK, VS, JK, BYAA, DP, FN, GH, PV, OP) have made conceptual contributions to project design and procedures. All authors read, edited and approved the final version.

**Funding**

Dominika Kwasnicka's work is carried out within the HOMING program of the Foundation for Polish Science co-financed by the European Union under the European Regional Development Fund; grant number POIR.04.04.00-00-5CF3/18-00; HOMING 5/2018. Dimitra Kale and Olga Perski receive salary support from Cancer Research UK (C1417/A22962). Daniel Powell is funded by the Scottish Government's Rural and Environment Science and Analytical Services (RESAS) and by the School of Medicine, Medical Sciences, and Nutrition (SMMSN) at the University of Aberdeen. Felix Naughton's salary is covered by the Faculty of Medicine and Health Sciences at the University of East Anglia.

**Acknowledgments**

The review team would like to thank Dr Marta Marques for comments and suggestions on the initial version of the review protocol. The authors would like to thank the patient and public involvement representative who commented on the lay summary of our proposed plan, for their contribution to this research.

**Competing interests**

The authors have no competing interests to declare.

**Data statement**

Data associated with this manuscript will be available on OSF.

## SYSTEMATIC REVIEW PROTOCOL OF EMA STUDIES

## Supplementary Material 1

PRISMA-P (Preferred Reporting Items for Systematic review and Meta-Analysis Protocols)

2015 checklist: recommended items to address in a systematic review protocol\*

| Section and topic                 | Item No       | Checklist item                                                                                                                                                                                                                | Page number |
|-----------------------------------|---------------|-------------------------------------------------------------------------------------------------------------------------------------------------------------------------------------------------------------------------------|-------------|
| <b>ADMINISTRATIVE INFORMATION</b> |               |                                                                                                                                                                                                                               |             |
| Title:                            |               |                                                                                                                                                                                                                               |             |
| Identification                    | 1a            | Identify the report as a protocol of a systematic review                                                                                                                                                                      | 1           |
|                                   | Update        | 1b If the protocol is for an update of a previous systematic review, identify as such                                                                                                                                         | NA          |
| Registration                      | 2             | If registered, provide the name of the registry (such as PROSPERO) and registration number                                                                                                                                    | 3           |
| Authors:                          |               |                                                                                                                                                                                                                               |             |
| Contact                           | 3a            | Provide name, institutional affiliation, e-mail address of all protocol authors; provide physical mailing address of corresponding author                                                                                     | 1-2         |
|                                   | Contributions | 3b Describe contributions of protocol authors and identify the guarantor of the review                                                                                                                                        | 18          |
| Amendments                        | 4             | If the protocol represents an amendment of a previously completed or published protocol, identify as such and list changes; otherwise, state plan for documenting important protocol amendments                               | NA          |
| Support:                          |               |                                                                                                                                                                                                                               |             |
| Sources                           | 5a            | Indicate sources of financial or other support for the review                                                                                                                                                                 | 18          |
| Sponsor                           | 5b            | Provide name for the review funder and/or sponsor                                                                                                                                                                             | 18          |
| Role of sponsor or funder         | 5c            | Describe roles of funder(s), sponsor(s), and/or institution(s), if any, in developing the protocol                                                                                                                            | 18          |
| <b>INTRODUCTION</b>               |               |                                                                                                                                                                                                                               |             |
| Rationale                         | 6             | Describe the rationale for the review in the context of what is already known                                                                                                                                                 | 6           |
| Objectives                        | 7             | Provide an explicit statement of the question(s) the review will address with reference to participants, interventions, comparators, and outcomes (PICO)                                                                      | 6-7         |
| <b>METHODS</b>                    |               |                                                                                                                                                                                                                               |             |
| Eligibility criteria              | 8             | Specify the study characteristics (such as PICO, study design, setting, time frame) and report characteristics (such as years considered, language, publication status) to be used as criteria for eligibility for the review | 7-8         |

## SYSTEMATIC REVIEW PROTOCOL OF EMA STUDIES

|                                    |     |                                                                                                                                                                                                                                                  |               |
|------------------------------------|-----|--------------------------------------------------------------------------------------------------------------------------------------------------------------------------------------------------------------------------------------------------|---------------|
| Information sources                | 9   | Describe all intended information sources (such as electronic databases, contact with study authors, trial registers or other grey literature sources) with planned dates of coverage                                                            | 8-9           |
| Search strategy                    | 10  | Present draft of search strategy to be used for at least one electronic database, including planned limits, such that it could be repeated                                                                                                       | 9; Appendix 2 |
| Study records:                     |     |                                                                                                                                                                                                                                                  |               |
| Data management                    | 11a | Describe the mechanism(s) that will be used to manage records and data throughout the review                                                                                                                                                     | 9-11          |
| Selection process                  | 11b | State the process that will be used for selecting studies (such as two independent reviewers) through each phase of the review (that is, screening, eligibility and inclusion in meta-analysis)                                                  | 9-11          |
| Data collection process            | 11c | Describe planned method of extracting data from reports (such as piloting forms, done independently, in duplicate), any processes for obtaining and confirming data from investigators                                                           | 10-11         |
| Data items                         | 12  | List and define all variables for which data will be sought (such as PICO items, funding sources), any pre-planned data assumptions and simplifications                                                                                          | 10-11         |
| Outcomes and prioritization        | 13  | List and define all outcomes for which data will be sought, including prioritization of main and additional outcomes, with rationale                                                                                                             | 10-11         |
| Risk of bias in individual studies | 14  | Describe anticipated methods for assessing risk of bias of individual studies, including whether this will be done at the outcome or study level, or both; state how this information will be used in data synthesis                             | 11-12         |
| Data synthesis                     | 15a | Describe criteria under which study data will be quantitatively synthesised                                                                                                                                                                      | 12-13         |
|                                    | 15b | If data are appropriate for quantitative synthesis, describe planned summary measures, methods of handling data and methods of combining data from studies, including any planned exploration of consistency (such as $I^2$ , Kendall's $\tau$ ) | 13            |
|                                    | 15c | Describe any proposed additional analyses (such as sensitivity or subgroup analyses, meta-regression)                                                                                                                                            | 13            |
|                                    | 15d | If quantitative synthesis is not appropriate, describe the type of summary planned                                                                                                                                                               | 13            |
| Meta-bias(es)                      | 16  | Specify any planned assessment of meta-bias(es) (such as publication bias across studies, selective reporting within studies)                                                                                                                    | 11-12         |
| Confidence in cumulative evidence  | 17  | Describe how the strength of the body of evidence will be assessed (such as GRADE)                                                                                                                                                               | 11-12         |

\* It is strongly recommended that this checklist be read in conjunction with the PRISMA-P Explanation and Elaboration (cite when available) for important clarification on the items. Amendments to a review protocol should be tracked and dated. The copyright for PRISMA-P

## SYSTEMATIC REVIEW PROTOCOL OF EMA STUDIES

(including checklist) is held by the PRISMA-P Group and is distributed under a Creative Commons Attribution Licence 4.0. *From: Shamseer L, Moher D, Clarke M, Ghersi D, Liberati A, Petticrew M, Shekelle P, Stewart L, PRISMA-P Group. Preferred reporting items for systematic review and meta-analysis protocols (PRISMA-P) 2015: elaboration and explanation. BMJ. 2015 Jan 2;349(jan02 1):g7647.*

For peer review only

SYSTEMATIC REVIEW PROTOCOL OF EMA STUDIES

1  
2  
3  
4  
5  
6  
7  
8  
9  
10  
11  
12  
13  
14  
15  
16  
17  
18  
19  
20  
21  
22  
23  
24  
25  
26  
27  
28  
29  
30  
31  
32  
33  
34  
35  
36  
37  
38  
39  
40  
41  
42  
43  
44  
45  
46  
47  
48  
49  
50  
51  
52  
53  
54  
55  
56  
57  
58  
59  
60

For peer review only

## Supplementary Material 2 - Electronic search strategy

### *Ovid MEDLINE, Embase, PsycINFO*

1. (ecological adj1 momentary adj1 assessment\*).ti,ab.
2. (intensive adj1 longitudinal).ti,ab.
3. (ambulatory adj1 assessment\*).ti,ab.
4. (experience adj1 sampl\*).ti,ab.
5. (daily adj1 diar\*).ti,ab.
6. (ecological adj1 momentary adj1 intervention).ti,ab.
7. within-person.ti,ab.
8. within-subject\*.ti,ab.
9. (single adj1 case).ti,ab.
10. idiographic.ti,ab.
11. intraindividual.ti,ab.
12. 1 OR 2 OR 3 OR 4 OR 5 OR 6 OR 7 OR 8 OR 9 OR 10 OR 11
13. tobacco.ti,ab.
14. smok\*.ti,ab.
15. cigarette.ti,ab.
16. alcohol\*.ti,ab.
17. drinking.ti,ab.
18. addict\*.ti,ab.
19. diet.ti,ab.
20. weight.ti,ab.
21. overweight.ti,ab.
22. obes\*.ti,ab.
23. (healthy adj3 eat\*).ti,ab.
24. physical activity.ti,ab.
25. exercise.ti,ab.
26. sedentary.ti,ab.
27. sitting.ti,ab.
28. leisure.ti,ab.
29. (sexual adj1 health).ti,ab.
30. condom.ti,ab.
31. contraceptive.ti,ab.
32. 13 OR 14 OR 15 OR 16 OR 17 OR 18 OR 19 OR 20 OR 21 OR 22 OR 23 OR 24 OR 25 OR 26 OR 27 OR 28 OR 29 OR 30 OR 31
33. 12 AND 32

Results: 18,014

### *Web of Science*

1. TS=(ecological NEAR/1 momentary NEAR/1 assessment\*)
2. TS=(ecological NEAR/1 momentary NEAR/1 intervention)
3. TS=(intensive NEAR/1 longitudinal)
4. TS=(ambulatory NEAR/1 assessment\*)
5. TS=(experience NEAR/1 sampl\*)
6. TS=(daily NEAR/1 diar\*)
7. TS=(within-person or within-subject\* or idiographic or intraindividual)

- 1
- 2
- 3
- 4 8. TS=(single NEAR/1 case)
- 5 9. 1 OR 2 OR 3 OR 4 OR 5 OR 6 OR 7 OR 8
- 6 10. TS=(healthy NEAR/1 eat\*)
- 7 11. TS=(sexual NEAR/1 health)
- 8 12. TS=(smok\* or tobacco\* or cigarette or alcohol\* or drinking or addict\* or diet or weight
- 9 or overweight or obes\* or physical activity or exercise or sedentary or leisure or sitting or
- 10 condom or contraceptive)
- 11 13. 10 OR 11 OR 12
- 12 14. 9 AND 13
- 13

14  
15 Results: 11,036

16  
17  
18  
19  
20  
21  
22  
23  
24  
25  
26  
27  
28  
29  
30  
31  
32  
33  
34  
35  
36  
37  
38  
39  
40  
41  
42  
43  
44  
45  
46  
47  
48  
49  
50  
51  
52  
53  
54  
55  
56  
57  
58  
59  
60

For peer review only

# BMJ Open

## Systematic review of Ecological Momentary Assessment (EMA) studies of five public health-related behaviours: Review Protocol.

|                                 |                                                                                                                                                                                                                                                                                                                                                                                                                                                                                                                                                                                                                                                                                                                                                                     |
|---------------------------------|---------------------------------------------------------------------------------------------------------------------------------------------------------------------------------------------------------------------------------------------------------------------------------------------------------------------------------------------------------------------------------------------------------------------------------------------------------------------------------------------------------------------------------------------------------------------------------------------------------------------------------------------------------------------------------------------------------------------------------------------------------------------|
| Journal:                        | <i>BMJ Open</i>                                                                                                                                                                                                                                                                                                                                                                                                                                                                                                                                                                                                                                                                                                                                                     |
| Manuscript ID                   | bmjopen-2020-046435.R2                                                                                                                                                                                                                                                                                                                                                                                                                                                                                                                                                                                                                                                                                                                                              |
| Article Type:                   | Protocol                                                                                                                                                                                                                                                                                                                                                                                                                                                                                                                                                                                                                                                                                                                                                            |
| Date Submitted by the Author:   | 09-Jun-2021                                                                                                                                                                                                                                                                                                                                                                                                                                                                                                                                                                                                                                                                                                                                                         |
| Complete List of Authors:       | Kwasnicka, Dominika; SWPS University of Social Sciences and Humanities Wroclaw Campus Library, Faculty of Psychology<br>Kale, Dimitra; University College London<br>Schneider, Verena; University College London<br>Keller, Jan; Freie Universität Berlin<br>Yeboah-Asiamah Asare, Bernard; Curtin University<br>Powell, Daniel; University of Aberdeen<br>Naughton, Felix; University of East Anglia Faculty of Medicine and Health Sciences, School of Health Sciences; University of East Anglia<br>ten Hoor, Gill A. ; Department of Work & Social Psychology, Maastricht University,<br>Verboon, Peter; Open Universiteit Nederland Faculteit Managementwetenschappen<br>Perski, Olga; University College London, Department of Behavioural Science and Health |
| <b>Primary Subject Heading</b>: | Public health                                                                                                                                                                                                                                                                                                                                                                                                                                                                                                                                                                                                                                                                                                                                                       |
| Secondary Subject Heading:      | Public health                                                                                                                                                                                                                                                                                                                                                                                                                                                                                                                                                                                                                                                                                                                                                       |
| Keywords:                       | PUBLIC HEALTH, STATISTICS & RESEARCH METHODS, SOCIAL MEDICINE, SPORTS MEDICINE, NUTRITION & DIETETICS                                                                                                                                                                                                                                                                                                                                                                                                                                                                                                                                                                                                                                                               |
|                                 |                                                                                                                                                                                                                                                                                                                                                                                                                                                                                                                                                                                                                                                                                                                                                                     |

SCHOLARONE™  
Manuscripts





I, the Submitting Author has the right to grant and does grant on behalf of all authors of the Work (as defined in the below author licence), an exclusive licence and/or a non-exclusive licence for contributions from authors who are: i) UK Crown employees; ii) where BMJ has agreed a CC-BY licence shall apply, and/or iii) in accordance with the terms applicable for US Federal Government officers or employees acting as part of their official duties; on a worldwide, perpetual, irrevocable, royalty-free basis to BMJ Publishing Group Ltd ("BMJ") its licensees and where the relevant Journal is co-owned by BMJ to the co-owners of the Journal, to publish the Work in this journal and any other BMJ products and to exploit all rights, as set out in our [licence](#).

The Submitting Author accepts and understands that any supply made under these terms is made by BMJ to the Submitting Author unless you are acting as an employee on behalf of your employer or a postgraduate student of an affiliated institution which is paying any applicable article publishing charge ("APC") for Open Access articles. Where the Submitting Author wishes to make the Work available on an Open Access basis (and intends to pay the relevant APC), the terms of reuse of such Open Access shall be governed by a Creative Commons licence – details of these licences and which [Creative Commons](#) licence will apply to this Work are set out in our licence referred to above.

Other than as permitted in any relevant BMJ Author's Self Archiving Policies, I confirm this Work has not been accepted for publication elsewhere, is not being considered for publication elsewhere and does not duplicate material already published. I confirm all authors consent to publication of this Work and authorise the granting of this licence.

## SYSTEMATIC REVIEW PROTOCOL OF EMA STUDIES

**Title:** Systematic review of Ecological Momentary Assessment (EMA) studies of five public health-related behaviours: Review Protocol.

**Authors:** Dominika Kwasnicka<sup>1,2</sup>, Dimitra Kale<sup>3</sup>, Verena Schneider<sup>3</sup>, Jan Keller<sup>4</sup>, Bernard Yeboah-Asiamah Asare<sup>5,6</sup>, Daniel Powell<sup>6,7</sup>, Felix Naughton<sup>8</sup>, Gill ten Hoor<sup>9</sup>, Peter Verboon<sup>10</sup>, Olga Perski<sup>3</sup>

1. Faculty of Psychology, SWPS University of Social Sciences and Humanities, Aleksandra Ostrowskiego 30b, 53-238, Wrocław, Poland
2. NHMRC CRE in Digital Technology to Transform Chronic Disease Outcomes, Melbourne School of Population and Global Health, University of Melbourne, 333 Exhibition Street, 3000, Melbourne, Australia
3. Department of Behavioural Science and Health, Institute of Epidemiology and Health, Faculty of Population Health Sciences, University College London, United Kingdom
4. Department of Education and Psychology, Freie Universität Berlin, Berlin, Germany
5. School of Public Health, Curtin University, Kent Street, 6102, Perth, Australia
6. Health Psychology, Institute of Applied Health Sciences, University of Aberdeen, Aberdeen, AB25 2ZD, United Kingdom
7. Rowett Institute, University of Aberdeen, Aberdeen, AB25 2ZD, United Kingdom
8. Behavioural and Implementation Science Research Group, School of Health Sciences, University of East Anglia, Norwich, NR4 7UL, United Kingdom
9. Department of Work and Social Psychology, Faculty of Psychology and Neurosciences, Maastricht University, Maastricht, The Netherlands

## SYSTEMATIC REVIEW PROTOCOL OF EMA STUDIES

1  
2  
3 10. Faculty of Psychology, Open University, Heerlen, The Netherlands  
4  
5

6 **Corresponding author:** Dominika Kwasnicka, Faculty of psychology SWPS University of  
7  
8 Social Sciences and Humanities, Aleksandra Ostrowskiego 30b, 53-238, Wrocław and  
9  
10 NHMRC CRE in Digital Technology to Transform Chronic Disease Outcomes, Melbourne  
11  
12 School of Population and Global Health, University of Melbourne, 333 Exhibition Street, 3000,  
13  
14 Melbourne, Australia. E-mail: [dkwasnicka@swps.edu.pl](mailto:dkwasnicka@swps.edu.pl)  
15  
16

17  
18  
19 **Word count:** 3,446  
20  
21

22 **Keywords:** ambulatory assessment, Ecological Momentary Assessment, EMA, experience  
23  
24 sampling, health, psychology, systematic review, within-person design  
25  
26  
27  
28  
29  
30  
31  
32  
33  
34  
35  
36  
37  
38  
39  
40  
41  
42  
43  
44  
45  
46  
47  
48  
49  
50  
51  
52  
53  
54  
55  
56  
57  
58  
59  
60

## SYSTEMATIC REVIEW PROTOCOL OF EMA STUDIES

**ABSTRACT**

**Introduction:** Ecological Momentary Assessment (EMA) involves repeated, real-time assessments of phenomena (e.g., cognitions, emotions, behaviours) over a period of time in naturalistic settings. EMA is increasingly used to study both within- and between-person processes. We will review EMA studies investigating key health behaviours and synthesise: 1) study characteristics (e.g., frequency of assessments, adherence, incentives), 2) associations between psychological predictors and behaviours, and 3) moderators of adherence to EMA protocols.

**Methods and analysis:** This review will focus on EMA studies conducted across five public health behaviours in adult, non-clinical populations: movement behaviour (including physical activity and sedentary behaviour), dietary behaviour, alcohol consumption, tobacco smoking, and preventive sexual health behaviours. Studies need to have assessed at least one psychological or contextual predictor of these behaviours. Studies reporting exclusively on physiological outcomes (e.g., cortisol) or those not conducted under free-living conditions will be excluded. We will search OVID Medline, Embase, PsycINFO and Web of Science using terms relevant to EMA and the selected health behaviours. Reference lists of existing systematic reviews of EMA studies will be hand searched. Identified articles will be screened by two reviewers. This review is expected to provide a comprehensive summary of EMA studies assessing psychological or contextual predictors of five public health behaviours.

**Ethics and dissemination:** The results will be disseminated through peer-reviewed publications and presentations. Data from included studies will be made available to other researchers. No ethics are required.

**Review registration:** The review protocol has been registered with PROSPERO 2020 CRD42020168314. Available from:  
[www.crd.york.ac.uk/prospero/display\\_record.php?ID=CRD42020168314](http://www.crd.york.ac.uk/prospero/display_record.php?ID=CRD42020168314).

## SYSTEMATIC REVIEW PROTOCOL OF EMA STUDIES

**Strengths and limitations of this study:**

- A protocol for systematic review is provided for EMA studies in adult, non-clinical populations.
- We included EMA studies of five key public health behaviours including movement behaviours, dietary behaviours, alcohol consumption, tobacco smoking, and preventive sexual health behaviours.
- We will review characteristics of EMA studies (e.g., study duration in days, incentives, adherence rates) and associations between psychological predictors and behaviours, examining rates of adherence to EMA protocols across different health behaviours and moderators of adherence (e.g., study setting, type of behaviour).
- Extracted data will be made available to other researchers, thus allowing for the exploration of additional research questions and potential for setting up a 'living review'.
- As included studies are likely to be heterogeneous, this may limit the overarching conclusions that can be drawn, and will likely prevent meta-analysis combining effect sizes from multiple studies and across all behaviours.

## SYSTEMATIC REVIEW PROTOCOL OF EMA STUDIES

**INTRODUCTION**

Ecological Momentary Assessment (EMA), also known as ambulatory assessment or experience sampling methodology, involves repeated, real-time assessments of phenomena (e.g., cognitions, emotions and behaviours) over a period of time in naturalistic settings (1). EMA is increasingly used to study within- and between-person processes, including associations between psychological and health behaviour-related variables (e.g., positive affect and physical activity in general population or stress and lapse risk in smokers attempting to stop). For researchers and healthcare professionals to understand and change behaviour, it is important for theories and interventions to be applicable to both momentary states of individuals (within-person processes) and groups of individuals (between-person processes) (2). Despite the popularity and importance of EMA for studying health-related behaviours, there has been no comprehensive systematic investigation of characteristics of EMA studies (e.g., rates of adherence, study duration in days, incentive schedules) and potential moderators of adherence (e.g., study setting, type of health behaviour), with attempts to describe associations between psychological predictors (e.g., intentions, self-efficacy) and key public health behaviours.

Previous reviews of EMA studies have focused on clinical conditions such as borderline personality disorder (3), psychotic disorder (4), mood disorders (5), binge eating (6), bulimia nervosa (7), anxiety disorder (8), schizophrenia (9), alcohol use disorder (10), chronic pain (11), and specific populations such as children and adolescents (12), youth (13) and older adults (14). Health behaviour-specific reviews of EMA studies have focused on physical activity (15,16), sedentary behaviour (16), alcohol use (17), craving and substance use (18), dietary behaviours (19), and the relationship between alcohol use and sexual decision making (20). Previous EMA reviews have also focused on interrelations between specific psychological

## SYSTEMATIC REVIEW PROTOCOL OF EMA STUDIES

1  
2  
3 variables, such as the association of everyday social interactions with intra-individual  
4  
5 variability in affect (21).  
6

7  
8 While systematic reviews of EMA studies focusing on specific health behaviours have  
9  
10 been conducted (18,22,23), there are no overarching reviews that can help address broad  
11  
12 questions about study characteristics (e.g., study duration in days, adherence, incentive  
13  
14 schedules), rates and moderators of adherence (e.g., study setting, participant characteristics)  
15  
16 and predictor-behaviour associations across different health behaviours and potential  
17  
18 moderators (e.g., study setting, study quality). It is expected that this review will help fill this  
19  
20 gap. We also expect that this review will help inform the design of future EMA studies by  
21  
22 providing a summary of best practice across research contexts, settings and health-related  
23  
24 behaviours. For instance, results may be useful for informing researchers' understanding of  
25  
26 what frequency or intensity of change we would expect to see at what temporal resolution [i.e.,  
27  
28 informed by a 'theory of change' (24)], which can then inform assessment scheduling  
29  
30 decisions. This review is likely to include a large number of studies, thus providing a  
31  
32 comprehensive overview of the EMA literature.  
33  
34  
35  
36

### 37 **The current study**

38  
39 We will synthesise evidence from EMA studies that report either within- or between-  
40  
41 person predictor-behaviour associations. The review will focus on five key public health  
42  
43 behaviours: (1) movement behaviours (including physical activity and sedentary behaviour),  
44  
45 (2) dietary behaviours, (3) alcohol consumption, (4) tobacco smoking and (5) preventive sexual  
46  
47 health behaviours (including contraceptive use).  
48  
49

50  
51 The review aims are:

- 52  
53 1. To summarise adherence to EMAs, total length of data collection of EMAs, prompting  
54  
55 frequency of EMAs, and incentives structures across studies.  
56  
57  
58  
59  
60

## SYSTEMATIC REVIEW PROTOCOL OF EMA STUDIES

2. To describe within- and between-person predictor-behaviour associations across EMA studies (e.g., associations between intention and behaviour).
3. To assess potential moderators of adherence to EMAs (e.g., study setting, participant characteristics).

This review is intentionally broad in scope to provide an overview of the field for researchers interested in the application of EMAs to the study of health-related behaviours. We expect this overarching review to help identify patterns and key knowledge gaps.

## METHODS AND ANALYSIS

### Study design

This review will adhere to the Preferred Reporting Items for Systematic Reviews and Meta-Analyses (PRISMA) checklist (Supplementary Material 1). The review start date was 15<sup>th</sup> September 2019 and the planned end date is 30<sup>th</sup> December 2021.

### Inclusion criteria

This review will focus on five key public health behaviours in healthy adults (i.e. non-clinical populations) aged 18+ years, namely:

1. movement behaviours, including physical activity and sedentary behaviour;
2. dietary behaviours, including snacking or fruit and vegetable consumption;
3. alcohol consumption;
4. tobacco smoking, including cigarette, cigar or pipe smoking;
5. preventive sexual health behaviours, including contraceptive/condom use.

No restrictions on geographical location or publication date will be set. To be included, studies need to incorporate multiple (i.e., two or more) within-day, daily or weekly assessments of predictors and behaviours, and to have reported either (or both) within- or between-person predictor-behaviour (e.g., stress predicting unhealthy snack consumption) associations. The



## SYSTEMATIC REVIEW PROTOCOL OF EMA STUDIES

1  
2  
3 frequency of the EMAs should plausibly match how the target behaviour (and psychological  
4 and contextual predictors) theoretically or empirically unfolds over time, e.g., daily  
5 assessments of steps, weekly assessments of gym class attendance if the class is undertaken  
6 only once a week. To be included, studies need to assess one of the aforementioned behaviours  
7 and at least one psychological or contextual variable via EMAs.  
8  
9

10  
11  
12 In this review, we defined psychological variables as emergent properties of a distributed  
13 network of neurons, including cognition (e.g., beliefs, attitudes, goals), emotion (e.g., negative  
14 affect, cravings) and processes operating on these (e.g., self-regulation, learning), which are  
15 linked to behaviour. We further define contextual variables as any potential environmental  
16 (e.g., social or physical) influences on behaviour, including the presence of other people,  
17 weather, or the availability of unhealthy foods/cigarettes/alcohol. The psychological and  
18 contextual variables will be closely assessed by the reviewers as to their suitability for  
19 inclusion/exclusion in the review.  
20  
21  
22  
23  
24  
25  
26  
27  
28  
29  
30  
31  
32

33 In addition to self-report measures, included studies can use physiological measures of  
34 psychological predictors (e.g., cortisol or heart rate variability to measure stress) or behaviours  
35 (e.g., accelerometer data to measure physical activity or sedentary behaviour). Studies  
36 reporting associations between behaviours and psychological consequences (e.g., whether  
37 physical activity predicts affect) will be included providing that they also report psychological  
38 or contextual predictor-behaviour associations (e.g., whether positive affect predicts physical  
39 activity). We will include individuals with overweight and obesity given that 39% of adults  
40 globally fall into this category, with most Western countries averaging above 50% (25). Studies  
41 including participants with a diagnosed mental or physical health condition who were not  
42 recruited into the study on the basis of their condition will be included (e.g., studies including  
43 participants with clinical levels of depression but where this was not an inclusion criterion).  
44  
45  
46  
47  
48  
49  
50  
51  
52  
53  
54  
55  
56  
57  
58  
59  
60

## SYSTEMATIC REVIEW PROTOCOL OF EMA STUDIES

1  
2  
3 Studies in which a behavioural or pharmacological intervention was delivered will be included  
4  
5 providing that participants were asked to complete free-living EMAs.  
6  
7

**Exclusion criteria**

8  
9  
10 Laboratory studies will not be included. Studies examining clinical populations, that is,  
11 solely recruiting participants on the basis of being diagnosed with a physical or mental health  
12 condition such as cancer, cardiovascular disease, depression, binge eating disorder or substance  
13 use disorder (also including case-control studies) will be excluded. Studies focusing only on  
14 purchasing behaviours (e.g., tobacco purchasing, food purchasing) will not be included. Studies  
15 focusing on e-cigarettes will be also excluded. Studies not published in English or where no  
16 full text could be obtained will also not be included. Although behaviour-behaviour  
17 associations may also be considered relevant, our electronic search is not designed to capture  
18 such studies, and behaviour-behaviour associations will hence not be considered further in this  
19 review.  
20  
21  
22  
23  
24  
25  
26  
27  
28  
29  
30  
31  
32

**Search methods for the identification of studies***Electronic searches*

33  
34  
35 We will search Ovid MEDLINE, Embase, PsycINFO and Web of Science (see Supplementary  
36 Material 2 for the full search strategy). Terms will be searched in titles and abstracts as free  
37 text terms or as index terms (e.g., Medical Subject Headings), as appropriate. We will combine  
38 two groups of terms, the first with terms relevant to EMAs and within-person study designs;  
39 the second with terms relevant to the five health behaviours addressed in this review.  
40  
41  
42  
43  
44  
45  
46  
47  
48

49 Example terms used:

- 50  
51 1. (ecological adj1 momentary adj1 assessment\*) OR (intensive adj1 longitudinal) OR  
52 (ambulatory adj1 assessment\*) OR (experience adj1 sampl\*) OR (daily adj1 diar\*) OR  
53 (ecological adj1 momentary adj1 intervention) OR within-person OR within-subject\*  
54 OR (single adj1 case) OR idiographic OR intraindividual  
55  
56  
57  
58  
59  
60

## SYSTEMATIC REVIEW PROTOCOL OF EMA STUDIES

- 1
- 2
- 3 2. tobacco OR smok\* OR cigarette OR alcohol\* OR drinking OR addict\* OR (healthy
- 4 adj3 eat\*) OR diet OR weight OR overweight OR obes\* OR physical activity OR
- 5 exercise OR sedentary OR sitting OR leisure OR (sexual adj1 health) OR condom OR
- 6 contraceptive
- 7
- 8
- 9
- 10
- 11
- 12 3. 1 AND 2
- 13

14 Electronic and hand searches were conducted in January 2020 and updated in February 2021.

15 We restricted the search to human studies available in English that are published in peer-

16 reviewed journals (Supplementary Material 2).

### 21 *Searching for other sources*

22 Reference lists of existing systematic reviews of EMA studies will be hand searched and

23 expertise within the review team will be used to identify additional articles of interest.

### 28 **Data collection and analysis**

#### 30 *Selection of studies*

31 Identified articles will be merged using Covidence (26) and duplicate records will be removed.

32

33 The three lead authors (DK, OP and JK) will independently screen titles and abstracts (yes,

34 maybe, no) against the pre-specified inclusion criteria. Full texts will be screened by two

35 reviewers independently (yes, no); discrepancies will be resolved by the lead authors and

36 inclusion will be further discussed with other team members if needed. In line with the

37 PRISMA checklist, key reasons for exclusion will be recorded at the full text stage. These will

38 include: lack of psychological predictors or outcomes; study not being relevant to the five key

39 public health behaviours of interest; wrong study design (not an EMA study); participants

40 being recruited based on a health condition (i.e., clinical population); participants younger than

41 18 years old; studies of purchasing behaviours; conference abstracts; protocols; duplicates;

42 studies not published in English or no full text could be obtained. We will follow the hierarchy

43

44

45

46

47

48

49

50

51

52

53

54

55

56

57

58

59

60

## SYSTEMATIC REVIEW PROTOCOL OF EMA STUDIES

of the exclusion criteria, listing the first reason from the aforementioned list as the key reason for exclusion.

**Data extraction and management**

A data extraction form will be developed in Microsoft Excel to extract information and to import data into R for analysis. Each study will be allocated a unique study identification number. Data will be extracted on:

- *Study description* (study author, year, country, study funder);
- *Participant characteristics* (sample size; mean or median age (SD); gender (% female); educational attainment (% university education); population type (e.g., men who have sex with men, older adults, general population), ethnicity (% White ethnicity);
- *EMA study type* (e.g., observational, interventional, both);
- *EMA delivery mode* (e.g., mobile phone, website/online, pen-and-paper);
- *EMA method* (e.g., signal contingent, event contingent, multiple);
- *EMA characteristics* (e.g., total study duration in days; prompting frequency (e.g., hourly, daily, weekly), incentive schedule (e.g., flat rate, payment per EMA);
- *Adherence to EMA* (e.g., average % EMAs completed out of available prompts);
- *Health behaviour(s) assessed* (e.g., physical activity, sedentary behaviour, dietary behaviour, tobacco smoking); and how the health behaviour(s) were measured (e.g., hourly step count, number of cigarettes smoked per day);
- *Psychological and contextual predictors* (e.g., intentions, self-efficacy, presence of other smokers) and how they were measured (e.g., EMA method, measurement frequency, whether the measure was developed for the study (versus precedent), whether a single item or multiple items were used);

## SYSTEMATIC REVIEW PROTOCOL OF EMA STUDIES

- *Statistical model used to examine predictor-behaviour association* (e.g. multilevel model, generalised estimating equation) and whether these associations were analysed on the within- and/or between-level;
- *Level of aggregation in data analysis* (i.e. whether data underpinning the predictor-behaviour association are aggregated vs. maintained at the within-person level);
- *Coefficients and effect sizes from statistical models* (e.g. odds ratios, relative risks, regression coefficients);
- *Control variables in multivariate models* (e.g. age, sex)

For each study, one reviewer will extract the data. At least 20% of studies stratified by behaviour (e.g., 20% of all alcohol consumption studies) will be double checked for accuracy and completeness by a second reviewer. In case there are any uncertainties related to data extraction (e.g., the primary data extractor is uncertain about a particular parameter or a large number of discrepancies are observed across the primary and secondary data extractor), we will double check additional studies until agreement is achieved. All review authors will be involved in data extraction and double checking.

### **Quality appraisal**

Included studies may vary in quality, which will be considered through a quality appraisal. The appraisal tool was developed by the review team, based on an existing EMA reporting checklist (27), and includes the following four criteria: 1) rationale for EMA design, 2) a priori power analysis to determine sample size, 3) percentage adherence to the EMA protocol, and 4) treatment of missingness (Table 1). The quality indicators will be coded by one reviewer, with 20% or more double checked by a second reviewer. Discrepancies will be resolved through discussion among the lead authors. Where possible, each study quality indicator will be entered as a moderator of predictor-behaviour associations. As each criterion

## SYSTEMATIC REVIEW PROTOCOL OF EMA STUDIES

refers to a different aspect of study quality, we will not summarise study quality, but will present how studies score on each selected dimension.

| <i>Topic: Factors</i>                                                                                                                              | <b>Strong</b>                                                                                                                                                                      | <b>Moderate</b>                                                                                           | <b>Weak</b>                                                                     |
|----------------------------------------------------------------------------------------------------------------------------------------------------|------------------------------------------------------------------------------------------------------------------------------------------------------------------------------------|-----------------------------------------------------------------------------------------------------------|---------------------------------------------------------------------------------|
| <b>Rationale</b>                                                                                                                                   |                                                                                                                                                                                    |                                                                                                           |                                                                                 |
| <b>1. Rationale for EMA design provided:</b> Why was an EMA design chosen to examine the research question?                                        | A strong rationale provided for the EMA design of predictor AND behaviour/ outcome                                                                                                 | Rationale provided but not very strong for the EMA design of either the predictor OR behaviour/ outcome   | No rationale for the EMA design regarding predictor and behaviour/ outcome      |
| <b>Power analysis, sample size and participant adherence</b>                                                                                       |                                                                                                                                                                                    |                                                                                                           |                                                                                 |
| <b>2. Power analysis:</b> A priori power analysis to determine sample size                                                                         | An a priori power analysis is reported and the enrolled sample size met power analysis indication / OR: sufficient explanation as to why an a priori power analysis was not needed | An a priori power analysis is reported but sufficient sample size/number of observations was not achieved | No information about power analysis / OR: a post-hoc power analysis is reported |
| <b>3. Adherence to EMA protocol:</b> Percentage of answered EMA prompts across all participants for the main EMA study period                      | Percentage of answered EMA prompts >80%                                                                                                                                            | Percentage of answered EMA prompts 60-79.99%                                                              | Percentage of answered EMA prompts less than 60%                                |
| <b>Data analysis</b>                                                                                                                               |                                                                                                                                                                                    |                                                                                                           |                                                                                 |
| <b>4. Treatment of missingness:</b> Report whether study dropout or non-adherence to EMAs (e.g., missed prompts) are related to specific variables | Missing mechanisms/predictors are identified, reported and mitigated for if needed                                                                                                 | Missing mechanisms/predictors are identified and reported but not mitigated for                           | Missing mechanisms/predictors are not identified or reported                    |

**Table 1.** Quality appraisal in included EMA studies.

### Data synthesis

All quantitative analyses will be conducted in R v.3.5.1. A narrative (descriptive) synthesis will be conducted. We will summarise the number of EMA studies conducted for

## SYSTEMATIC REVIEW PROTOCOL OF EMA STUDIES

1  
2  
3 each of the five health behaviours, study setting (e.g., country, immediate study setting), and  
4  
5 sample size (i.e. mean or median number of participants per study). We will then present results  
6  
7 in relation to each research question.  
8  
9

10 To address the first aim, we will summarise study and EMA characteristics, e.g., study  
11  
12 setting, population characteristics, percentage prompting frequency (e.g., % daily, % weekly),  
13  
14 percentage type of EMA method (e.g., % event contingent, % random assessments, %  
15  
16 continuous sensor based, % hybrid), percentage type of EMA delivery mode (e.g., %  
17  
18 smartphone app delivery), percentage type of incentive structure (e.g., % flat payment, %  
19  
20 payment per EMA, % no incentive), rates of EMA adherence (mean or median), and study  
21  
22 duration (mean or median).  
23  
24  
25

26 To address the second aim, we will summarise within- and between-person predictor-  
27  
28 behaviour associations across EMA studies (e.g., the type of psychological or contextual  
29  
30 predictor assessed, measurement type, frequency of measurement). If there is sufficient  
31  
32 homogeneity between studies (e.g., similar predictors assessed with similar measurement type  
33  
34 and frequency across  $\geq 3$  studies), within- or between-person predictor-behaviour associations  
35  
36 (e.g., odds ratios, relative risks, regression coefficients) will be synthesised with random effects  
37  
38 meta-analyses, grouped by behaviour. Analyses will be conducted with the 'metafor' or  
39  
40 'CTmeta' packages (28-30), as appropriate, also utilising 'jamovi' (31). Where sufficient detail  
41  
42 on model parameter estimates is lacking in the publications, we may contact study authors to  
43  
44 request access to additional information.  
45  
46  
47  
48

49 To address the third aim, we will assess, with regression analyses, whether EMA  
50  
51 adherence varies depending on study setting, study characteristics, participant characteristics,  
52  
53 or type of incentive schedule used. We do not have any pre-specified hypotheses. Where  
54  
55 appropriate, moderator analyses will be conducted to examine whether predictor-behaviour  
56  
57  
58  
59  
60

## SYSTEMATIC REVIEW PROTOCOL OF EMA STUDIES

1  
2  
3 associations vary depending on study setting, study characteristics, participant characteristics,  
4  
5 or type of incentive schedule used.  
6

**Patient and public involvement**

7  
8  
9  
10 A patient and public involvement representative reviewed a lay summary of the  
11  
12 protocol for our systematic review. Positive feedback was received on the review's aims, the  
13  
14 importance of the current research and choice of key behaviours relevant to public health. Once  
15  
16 the review is completed, feedback will be sought from the additional patient and public  
17  
18 involvement representatives about the interpretation of findings and plans for dissemination.  
19  
20 We will seek advice on how to best present the study outcomes and use them in order to design  
21  
22 studies and interventions that are useful and relevant for the public.  
23  
24

**ETHICS AND DISSEMINATION**

25  
26  
27  
28 This study does not require ethics approval as it will summarise data from previously published  
29  
30 studies. A protocol was pre-registered on the international Prospective Register of Systematic  
31  
32 Reviews (PROSPERO) and on the Open Science Framework; it will also be offered for peer-  
33  
34 review and publication in an open access journal. The findings of the review will be  
35  
36 disseminated through peer-reviewed publications and presentations at relevant conferences.  
37  
38 The dataset will be made available to other researchers online via the creation of a digital object  
39  
40 identifier, thus enabling further research questions to be addressed. We expect this review to  
41  
42 be useful for researchers and healthcare practitioners who regularly design and interpret results  
43  
44 from EMA studies. We plan to publish overarching review and subsequently five behaviour-  
45  
46 specific reviews that will provide a more in-depth synthesis of predictor-behaviour  
47  
48 associations.  
49  
50  
51  
52

**Summary**

53  
54  
55  
56 EMA is a frequently used research method; however, an overview of studies using this  
57  
58 method across key public health behaviours in healthy adults is lacking. This review will  
59  
60



## SYSTEMATIC REVIEW PROTOCOL OF EMA STUDIES

1  
2  
3 provide a comprehensive overview of associations between a psychological/contextual  
4 predictor and a health behaviour in EMA studies focusing on movement behaviours, dietary  
5 behaviours, alcohol consumption, tobacco smoking and sexual health behaviours. This review  
6 will inform the future design of EMA studies and it will influence practice of assessing  
7 individuals in real life settings and providing interventions that are delivered at the time and  
8 place when and where required. This review will set a blueprint for how to conduct EMA  
9 studies to improve participants' adherence and conduct meaningful studies in real life settings.  
10  
11  
12  
13  
14  
15  
16  
17  
18  
19  
20  
21  
22  
23  
24  
25  
26  
27  
28  
29  
30  
31  
32  
33  
34  
35  
36  
37  
38  
39  
40  
41  
42  
43  
44  
45  
46  
47  
48  
49  
50  
51  
52  
53  
54  
55  
56  
57  
58  
59  
60

## SYSTEMATIC REVIEW PROTOCOL OF EMA STUDIES

## REFERENCES

1. Stone AA, Shiffman S. Ecological momentary assessment (EMA) in behavioral medicine. *Ann Behav Med.* 1994;
2. Johnston DW, Johnston M. Useful theories should apply to individuals. *Br J Health Psychol.* 2013;18(3):469–73.
3. Santangelo P, Bohus M, Ebner-Priemer UW. Ecological momentary assessment in borderline personality disorder: a review of recent findings and methodological challenges. *J Personal Disord.* 2014;28(4):555–76.
4. Bell IH, Lim MH, Rossell SL, Thomas N. Ecological momentary assessment and intervention in the treatment of psychotic disorders: a systematic review. *Psychiatr Serv.* 2017;68(11):1172–81.
5. aan het Rot M, Hogenelst K, Schoevers RA. Mood disorders in everyday life: A systematic review of experience sampling and ecological momentary assessment studies. *Clin Psychol Rev.* 2012;32(6):510–23.
6. Haedt-Matt AA, Keel PK. Revisiting the affect regulation model of binge eating: a meta-analysis of studies using ecological momentary assessment. *Psychol Bull.* 2011;137(4):660.
7. Goldschmidt AB, Wonderlich SA, Crosby RD, Engel SG, Lavender JM, Peterson CB, et al. Ecological momentary assessment of stressful events and negative affect in bulimia nervosa. *J Consult Clin Psychol.* 2014;82(1):30.
8. Walz LC, Nauta MH, aan het Rot M. Experience sampling and ecological momentary assessment for studying the daily lives of patients with anxiety disorders: A systematic review. *J Anxiety Disord.* 2014;28(8):925–37.
9. Mote J, Fulford D. Ecological momentary assessment of everyday social experiences of people with schizophrenia: A systematic review. *Schizophr Res.* 2020;216:56–68.
10. Morgenstern J, Kuerbis A, Muench F. Ecological momentary assessment and alcohol use disorder treatment. *Alcohol Res Curr Rev.* 2014;36(1):101.
11. May M, Junghaenel DU, Ono M, Stone AA, Schneider S. Ecological momentary assessment methodology in chronic pain research: a systematic review. *J Pain.* 2018;19(7):699–716.
12. Wen CKF, Schneider S, Stone AA, Spruijt-Metz D. Compliance with mobile ecological momentary assessment protocols in children and adolescents: a systematic review and meta-analysis. *J Med Internet Res.* 2017;19(4):e132.
13. Heron KE, Everhart RS, McHale SM, Smyth JM. Using mobile-technology-based ecological momentary assessment (EMA) methods with youth: A systematic review and recommendations. *J Pediatr Psychol.* 2017;42(10):1087–107.
14. Cain AE, Depp CA, Jeste DV. Ecological momentary assessment in aging research: a critical review. *J Psychiatr Res.* 2009;43(11):987–96.

## SYSTEMATIC REVIEW PROTOCOL OF EMA STUDIES

15. Dunton GF. Ecological momentary assessment in physical activity research. *Exerc Sport Sci Rev.* 2017;45(1):48.
16. Degroote L, DeSmet A, De Bourdeaudhuij I, Van Dyck D, Crombez G. Content validity and methodological considerations in ecological momentary assessment studies on physical activity and sedentary behaviour: a systematic review. *Int J Behav Nutr Phys Act.* 2020;17(1):1–13.
17. Wray TB, Merrill JE, Monti PM. Using ecological momentary assessment (EMA) to assess situation-level predictors of alcohol use and alcohol-related consequences. *Alcohol Res Curr Rev.* 2014;36(1):19.
18. Serre F, Fatseas M, Swendsen J, Auriacombe M. Ecological momentary assessment in the investigation of craving and substance use in daily life: a systematic review. *Drug Alcohol Depend.* 2015;148:1–20.
19. Maugeri A, Barchitta M. A systematic review of ecological momentary assessment of diet: implications and perspectives for nutritional epidemiology. *Nutrients.* 2019;11(11):2696.
20. Scott-Sheldon LA, Carey KB, Cunningham K, Johnson BT, Carey MP, MASH Research Team. Alcohol use predicts sexual decision-making: a systematic review and meta-analysis of the experimental literature. *AIDS Behav.* 2016;20(1):19–39.
21. Liu H, Xie QW, Lou VW. Everyday social interactions and intra-individual variability in affect: A systematic review and meta-analysis of ecological momentary assessment studies. *Motiv Emot.* 2019;43(2):339–53.
22. Schembre SM, Liao Y, O’connor SG, Hingle MD, Shen S-E, Hamoy KG, et al. Mobile ecological momentary diet assessment methods for behavioral research: Systematic review. *JMIR MHealth UHealth.* 2018;6(11):e11170.
23. Jones A, Remmerswaal D, Verveer I, Robinson E, Franken IHA, Wen CKF, et al. Compliance with ecological momentary assessment protocols in substance users: a meta-analysis. *Addiction.* 2019 Apr;114(4):609–19.
24. Collins LM. Analysis of longitudinal data: The integration of theoretical model, temporal design, and statistical model. *Annu Rev Psychol.* 2006;57:505–28.
25. WHO. Obesity and overweight [Internet]. 2018 [cited 2020 Jan 11]. Available from: <https://www.who.int/news-room/fact-sheets/detail/obesity-and-overweight>
26. Veritas Health Innovation. Covidence systematic review software. 2016;
27. Liao Y, Skelton K, Dunton G, Bruening M. A Systematic Review of Methods and Procedures Used in Ecological Momentary Assessments of Diet and Physical Activity Research in Youth: An Adapted STROBE Checklist for Reporting EMA Studies (CREMAS). *J Med Internet Res.* 2016 Jun 21;18(6):e151.
28. Balaji Y, Sankaranarayanan S, Chellappa R. Metareg: Towards domain generalization using meta-regularization. In 2018. p. 998–1008.

## SYSTEMATIC REVIEW PROTOCOL OF EMA STUDIES

- 1
  - 2
  - 3
  - 4
  - 5
  - 6
  - 7
  - 8
  - 9
  - 10
  - 11
  - 12
  - 13
  - 14
  - 15
  - 16
  - 17
  - 18
  - 19
  - 20
  - 21
  - 22
  - 23
  - 24
  - 25
  - 26
  - 27
  - 28
  - 29
  - 30
  - 31
  - 32
  - 33
  - 34
  - 35
  - 36
  - 37
  - 38
  - 39
  - 40
  - 41
  - 42
  - 43
  - 44
  - 45
  - 46
  - 47
  - 48
  - 49
  - 50
  - 51
  - 52
  - 53
  - 54
  - 55
  - 56
  - 57
  - 58
  - 59
  - 60
29. Viechtbauer W. Metafor: meta-analysis package for R. R Package Version. 2010;2010:1–0.
30. Kuiper RM, Ryan O. Meta-analysis of Lagged Regression Models: A Continuous-time Approach. Struct Equ Model Multidiscip J. 2020 May 3;27(3):396–413.
31. Sahin MD, Aybek EC. Jamovi: An Easy to Use Statistical Software for the Social Scientists. Int J Assess Tools Educ. 2019;6(4):670–92.

For peer review only

## SYSTEMATIC REVIEW PROTOCOL OF EMA STUDIES

**Authors' contributions**

DK, OP, DP and FN conceived the project. DK and OP are the project leads and coordinators, they jointly drafted the manuscript. All authors (DK, VS, JK, BYAA, DP, FN, GH, PV, OP) have made conceptual contributions to project design and procedures. All authors read, edited and approved the final version.

**Funding**

Dominika Kwasnicka's work is carried out within the HOMING program of the Foundation for Polish Science co-financed by the European Union under the European Regional Development Fund; grant number POIR.04.04.00-00-5CF3/18-00; HOMING 5/2018. Dimitra Kale and Olga Perski receive salary support from Cancer Research UK (C1417/A22962). Daniel Powell is funded by the Scottish Government's Rural and Environment Science and Analytical Services (RESAS) and by the School of Medicine, Medical Sciences, and Nutrition (SMMSN) at the University of Aberdeen. Felix Naughton's salary is covered by the Faculty of Medicine and Health Sciences at the University of East Anglia.

**Acknowledgments**

The review team would like to thank Dr Marta Marques for comments and suggestions on the initial version of the review protocol. The authors would like to thank the patient and public involvement representative who commented on the lay summary of our proposed plan, for their contribution to this research.

**Competing interests**

The authors have no competing interests to declare.

**Data statement**

Data associated with this manuscript will be available on OSF.

## SYSTEMATIC REVIEW PROTOCOL OF EMA STUDIES

## Supplementary Material 1

PRISMA-P (Preferred Reporting Items for Systematic review and Meta-Analysis Protocols)

2015 checklist: recommended items to address in a systematic review protocol\*

| Section and topic                 | Item No       | Checklist item                                                                                                                                                                                                                | Page number |
|-----------------------------------|---------------|-------------------------------------------------------------------------------------------------------------------------------------------------------------------------------------------------------------------------------|-------------|
| <b>ADMINISTRATIVE INFORMATION</b> |               |                                                                                                                                                                                                                               |             |
| Title:                            |               |                                                                                                                                                                                                                               |             |
| Identification                    | 1a            | Identify the report as a protocol of a systematic review                                                                                                                                                                      | 1           |
|                                   | Update        | 1b If the protocol is for an update of a previous systematic review, identify as such                                                                                                                                         | NA          |
| Registration                      | 2             | If registered, provide the name of the registry (such as PROSPERO) and registration number                                                                                                                                    | 3           |
| Authors:                          |               |                                                                                                                                                                                                                               |             |
| Contact                           | 3a            | Provide name, institutional affiliation, e-mail address of all protocol authors; provide physical mailing address of corresponding author                                                                                     | 1-2         |
|                                   | Contributions | 3b Describe contributions of protocol authors and identify the guarantor of the review                                                                                                                                        | 18          |
| Amendments                        | 4             | If the protocol represents an amendment of a previously completed or published protocol, identify as such and list changes; otherwise, state plan for documenting important protocol amendments                               | NA          |
| Support:                          |               |                                                                                                                                                                                                                               |             |
| Sources                           | 5a            | Indicate sources of financial or other support for the review                                                                                                                                                                 | 18          |
| Sponsor                           | 5b            | Provide name for the review funder and/or sponsor                                                                                                                                                                             | 18          |
| Role of sponsor or funder         | 5c            | Describe roles of funder(s), sponsor(s), and/or institution(s), if any, in developing the protocol                                                                                                                            | 18          |
| <b>INTRODUCTION</b>               |               |                                                                                                                                                                                                                               |             |
| Rationale                         | 6             | Describe the rationale for the review in the context of what is already known                                                                                                                                                 | 6           |
| Objectives                        | 7             | Provide an explicit statement of the question(s) the review will address with reference to participants, interventions, comparators, and outcomes (PICO)                                                                      | 6-7         |
| <b>METHODS</b>                    |               |                                                                                                                                                                                                                               |             |
| Eligibility criteria              | 8             | Specify the study characteristics (such as PICO, study design, setting, time frame) and report characteristics (such as years considered, language, publication status) to be used as criteria for eligibility for the review | 7-8         |

## SYSTEMATIC REVIEW PROTOCOL OF EMA STUDIES

|                                    |     |                                                                                                                                                                                                                                                  |               |
|------------------------------------|-----|--------------------------------------------------------------------------------------------------------------------------------------------------------------------------------------------------------------------------------------------------|---------------|
| Information sources                | 9   | Describe all intended information sources (such as electronic databases, contact with study authors, trial registers or other grey literature sources) with planned dates of coverage                                                            | 8-9           |
| Search strategy                    | 10  | Present draft of search strategy to be used for at least one electronic database, including planned limits, such that it could be repeated                                                                                                       | 9; Appendix 2 |
| Study records:                     |     |                                                                                                                                                                                                                                                  |               |
| Data management                    | 11a | Describe the mechanism(s) that will be used to manage records and data throughout the review                                                                                                                                                     | 9-11          |
| Selection process                  | 11b | State the process that will be used for selecting studies (such as two independent reviewers) through each phase of the review (that is, screening, eligibility and inclusion in meta-analysis)                                                  | 9-11          |
| Data collection process            | 11c | Describe planned method of extracting data from reports (such as piloting forms, done independently, in duplicate), any processes for obtaining and confirming data from investigators                                                           | 10-11         |
| Data items                         | 12  | List and define all variables for which data will be sought (such as PICO items, funding sources), any pre-planned data assumptions and simplifications                                                                                          | 10-11         |
| Outcomes and prioritization        | 13  | List and define all outcomes for which data will be sought, including prioritization of main and additional outcomes, with rationale                                                                                                             | 10-11         |
| Risk of bias in individual studies | 14  | Describe anticipated methods for assessing risk of bias of individual studies, including whether this will be done at the outcome or study level, or both; state how this information will be used in data synthesis                             | 11-12         |
| Data synthesis                     | 15a | Describe criteria under which study data will be quantitatively synthesised                                                                                                                                                                      | 12-13         |
|                                    | 15b | If data are appropriate for quantitative synthesis, describe planned summary measures, methods of handling data and methods of combining data from studies, including any planned exploration of consistency (such as $I^2$ , Kendall's $\tau$ ) | 13            |
|                                    | 15c | Describe any proposed additional analyses (such as sensitivity or subgroup analyses, meta-regression)                                                                                                                                            | 13            |
|                                    | 15d | If quantitative synthesis is not appropriate, describe the type of summary planned                                                                                                                                                               | 13            |
| Meta-bias(es)                      | 16  | Specify any planned assessment of meta-bias(es) (such as publication bias across studies, selective reporting within studies)                                                                                                                    | 11-12         |
| Confidence in cumulative evidence  | 17  | Describe how the strength of the body of evidence will be assessed (such as GRADE)                                                                                                                                                               | 11-12         |

\* It is strongly recommended that this checklist be read in conjunction with the PRISMA-P Explanation and Elaboration (cite when available) for important clarification on the items. Amendments to a review protocol should be tracked and dated. The copyright for PRISMA-P

## SYSTEMATIC REVIEW PROTOCOL OF EMA STUDIES

(including checklist) is held by the PRISMA-P Group and is distributed under a Creative Commons Attribution Licence 4.0. *From: Shamseer L, Moher D, Clarke M, Ghersi D, Liberati A, Petticrew M, Shekelle P, Stewart L, PRISMA-P Group. Preferred reporting items for systematic review and meta-analysis protocols (PRISMA-P) 2015: elaboration and explanation. BMJ. 2015 Jan 2;349(jan02 1):g7647.*

For peer review only



SYSTEMATIC REVIEW PROTOCOL OF EMA STUDIES

1  
2  
3  
4  
5  
6  
7  
8  
9  
10  
11  
12  
13  
14  
15  
16  
17  
18  
19  
20  
21  
22  
23  
24  
25  
26  
27  
28  
29  
30  
31  
32  
33  
34  
35  
36  
37  
38  
39  
40  
41  
42  
43  
44  
45  
46  
47  
48  
49  
50  
51  
52  
53  
54  
55  
56  
57  
58  
59  
60

For peer review only

## Supplementary Material 2 - Electronic search strategy

### *Ovid MEDLINE, Embase, PsycINFO*

1. (ecological adj1 momentary adj1 assessment\*).ti,ab.
2. (intensive adj1 longitudinal).ti,ab.
3. (ambulatory adj1 assessment\*).ti,ab.
4. (experience adj1 sampl\*).ti,ab.
5. (daily adj1 diar\*).ti,ab.
6. (ecological adj1 momentary adj1 intervention).ti,ab.
7. within-person.ti,ab.
8. within-subject\*.ti,ab.
9. (single adj1 case).ti,ab.
10. idiographic.ti,ab.
11. intraindividual.ti,ab.
12. 1 OR 2 OR 3 OR 4 OR 5 OR 6 OR 7 OR 8 OR 9 OR 10 OR 11
13. tobacco.ti,ab.
14. smok\*.ti,ab.
15. cigarette.ti,ab.
16. alcohol\*.ti,ab.
17. drinking.ti,ab.
18. addict\*.ti,ab.
19. diet.ti,ab.
20. weight.ti,ab.
21. overweight.ti,ab.
22. obes\*.ti,ab.
23. (healthy adj3 eat\*).ti,ab.
24. physical activity.ti,ab.
25. exercise.ti,ab.
26. sedentary.ti,ab.
27. sitting.ti,ab.
28. leisure.ti,ab.
29. (sexual adj1 health).ti,ab.
30. condom.ti,ab.
31. contraceptive.ti,ab.
32. 13 OR 14 OR 15 OR 16 OR 17 OR 18 OR 19 OR 20 OR 21 OR 22 OR 23 OR 24 OR 25 OR 26 OR 27 OR 28 OR 29 OR 30 OR 31
33. 12 AND 32

Results: 18,014

### *Web of Science*

1. TS=(ecological NEAR/1 momentary NEAR/1 assessment\*)
2. TS=(ecological NEAR/1 momentary NEAR/1 intervention)
3. TS=(intensive NEAR/1 longitudinal)
4. TS=(ambulatory NEAR/1 assessment\*)
5. TS=(experience NEAR/1 sampl\*)
6. TS=(daily NEAR/1 diar\*)
7. TS=(within-person or within-subject\* or idiographic or intraindividual)

- 1
- 2
- 3
- 4 8. TS=(single NEAR/1 case)
- 5 9. 1 OR 2 OR 3 OR 4 OR 5 OR 6 OR 7 OR 8
- 6 10. TS=(healthy NEAR/1 eat\*)
- 7 11. TS=(sexual NEAR/1 health)
- 8 12. TS=(smok\* or tobacco\* or cigarette or alcohol\* or drinking or addict\* or diet or weight
- 9 or overweight or obes\* or physical activity or exercise or sedentary or leisure or sitting or
- 10 condom or contraceptive)
- 11 13. 10 OR 11 OR 12
- 12 14. 9 AND 13
- 13

14 Results: 11,036

15

16

17

18

19

20

21

22

23

24

25

26

27

28

29

30

31

32

33

34

35

36

37

38

39

40

41

42

43

44

45

46

47

48

49

50

51

52

53

54

55

56

57

58

59

60

For peer review only
